# Supplementary material for: Copper-catalyzed oxidation of arene-fused cyclic amines to cyclic imides
Source: Royal Society of Chemistry journal article supplement (doi:10.1039/c3cc45869e), 2013-01-01
Supplement: c3cc45869e.pdf [file c3cc45869e.pdf]

## Supporting Information

*For*

Copper-catalyzed oxidation of arene-fused cyclic amines to cyclic imides

Xiaoyu Yan<sup>a</sup>, Kun Fang<sup>a</sup>, Hailan Liu<sup>a</sup>, Chanjuan Xi<sup>\*a,b</sup>

<sup>a</sup>Key Laboratory of Bioorganic Phosphorus Chemistry & Chemical Biology (Ministry of Education), Department of Chemistry, Tsinghua University, Beijing 100084, China

<sup>b</sup>State Key Laboratory of Elemento-Organic Chemistry, Nankai University, Tianjin 300071, China

Email: cjxi@tsinghua.edu.cn

## Content

|                                                          |     |
|----------------------------------------------------------|-----|
| General Considerations                                   | S2  |
| Experimental Procedures                                  | S3  |
| Proposed mechanism                                       | S7  |
| References                                               | S8  |
| X-ray structure of <b>4a</b>                             | S9  |
| Copies of <sup>1</sup> H and <sup>13</sup> C NMR Spectra | S10 |

## General Considerations

All manipulations were conducted in sealed tube under an atmosphere of air. Unless otherwise noted, all starting materials were commercially available and were used without further purification. Isoindolines **1a-1k** were prepared by reaction of 1,2-bis(bromomethyl)benzene with amine in the presence of base.<sup>1-3</sup> Compound **II** was prepared by reaction of 1,8-bis(bromomethyl)naphthalene with methanamine. N,N-bispropargylamine was prepared by A<sup>3</sup> coupling.<sup>4</sup> <sup>1</sup>H NMR and <sup>13</sup>C NMR spectra were recorded on 300 MHz and 400 MHz NMR spectrometer with TMS as internal standard. Mass spectra were obtained using a Bruker Esquire ion trap mass spectrometer in positive ion mode. Flash column chromatography was performed on silica gel and Al<sub>2</sub>O<sub>3</sub> (200-300 mesh).

## Experimental Procedures

### *General procedure for copper-catalyzed oxidation of isoindoline*

To a 25 mL tube with teflon-coated magnetic stir bar and a rubber septum, was added isoindoline **1** (0.4 mmol), CuCl (0.04 mmol), CH<sub>2</sub>Cl<sub>2</sub> 1 mL, TBHP (0.55 mL, 4 mmol, 70% in water). The tube was sealed and stirred for 24 h at 50 °C. The reaction mixture was quenched by water and extracted by ethyl acetate. The organic extract was dried over MgSO<sub>4</sub>. Removing the solvent and subsequent purification by column chromatography on Al<sub>2</sub>O<sub>3</sub> afforded **2**.

### *Procedure for copper-catalyzed oxidation of isoindoline on 5 mmol scale*

To a 100 mL tube with teflon-coated magnetic stir bar and a rubber septum, was added isoindoline **1** (5 mmol), CuCl (0.5 mmol), CH<sub>2</sub>Cl<sub>2</sub> 13 mL, TBHP (6.9 mL, 50 mmol, 70% in water). The tube was sealed and stirred for 24 h at 50 °C. The reaction mixture was quenched by water and extracted by ethyl acetate. The organic extract was dried over MgSO<sub>4</sub>. Removing the solvent and subsequent purification by column chromatography on Al<sub>2</sub>O<sub>3</sub> afforded **2a** (589 mg).

### *Procedure for copper-catalyzed oxidation of isoindoline on 10 mmol scale*

To a 100 mL tube with teflon-coated magnetic stir bar and a rubber septum, was added isoindoline **1e** or **1g** (10 mmol), CuCl (1 mmol), CH<sub>2</sub>Cl<sub>2</sub> 25 mL, TBHP (13.7 mL, 100 mmol, 70% in water). The tube was sealed and stirred for 24 h at 50 °C. The reaction mixture was quenched by water and extracted by ethyl acetate. The organic extract was dried over MgSO<sub>4</sub>. Removing the solvent and subsequent purification by column chromatography on Al<sub>2</sub>O<sub>3</sub> afforded **2e** (995 mg) or **2g** (825 mg).

### **2-Butylisoindoline-1,3-dione, 2a<sup>5</sup>**

68% isolated yield. <sup>1</sup>H NMR (400 MHz, CDCl<sub>3</sub>) δ 7.84-7.80 (m, 2H), 7.71-7.67 (m, 2H), 3.67 (t, *J* =, 2H), 1.68-1.60 (m, 2H), 1.40-1.31 (m, 2H), 0.93 (t, *J* =, 3H); <sup>13</sup>C NMR (100 MHz, CDCl<sub>3</sub>) δ 168.5, 133.9, 132.3, 123.2, 37.9, 30.7, 20.2, 13.7. GC-MS: 203.

### **2-Octylisoindoline-1,3-dione, 2b<sup>6</sup>**

73% isolated yield. <sup>1</sup>H NMR (300 MHz, CDCl<sub>3</sub>) δ 7.84-7.80 (m, 2H), 7.72-7.68

(m, 2H), 3.66 (t,  $J = 7.2$  Hz, 2H), 1.70-1.62 (m, 2H), 1.43-1.24 (m, 10H), 0.85 (t,  $J = 6.4$  Hz, 3H);  $^{13}\text{C}$  NMR (75 MHz,  $\text{CDCl}_3$ )  $\delta$  168.5, 133.9, 132.3, 123.2, 38.2, 31.9, 29.2, 28.7, 27.0, 22.7, 14.2. GC-MS: 259.

**2-(*Tert*-butyl)isoindoline-1,3-dione, 2c<sup>7</sup>**

71% isolated yield.  $^1\text{H}$  NMR (400 MHz,  $\text{CDCl}_3$ )  $\delta$  7.77-7.74 (m, 2H), 7.69-7.65 (m, 2H), 1.69 (s, 9H);  $^{13}\text{C}$  NMR (100 MHz,  $\text{CDCl}_3$ )  $\delta$  169.8, 133.7, 132.2, 122.7, 57.9, 29.2. GC-MS: 203.

**2-Allylisoindoline-1,3-dione, 2d<sup>8</sup>**

45% isolated yield.  $^1\text{H}$  NMR (400 MHz,  $\text{CDCl}_3$ )  $\delta$  7.86-7.83 (m, 2H), 7.73-7.69 (m, 2H), 5.93-5.83 (m, 1H), 5.27-5.17 (m, 2H), 4.30-4.27 (m, 2H);  $^{13}\text{C}$  NMR (100 MHz,  $\text{CDCl}_3$ )  $\delta$  168.0, 134.0, 132.2, 131.6, 123.4, 117.8, 40.1. GC-MS: 187.

**2-Benzylisoindoline-1,3-dione, 2e<sup>5</sup>**

48% isolated yield.  $^1\text{H}$  NMR (300 MHz,  $\text{CDCl}_3$ )  $\delta$  7.85-7.80 (m, 2H), 7.71-7.67 (m, 2H), 7.45-7.25 (m, 5H), 4.84 (s, 2H);  $^{13}\text{C}$  NMR (75 MHz,  $\text{CDCl}_3$ )  $\delta$  168.1, 136.5, 134.0, 132.2, 128.8, 128.7, 127.9, 123.4, 41.7. GC-MS: 237.

**Methyl 2-(1,3-dioxoisoindolin-2-yl)acetate, 2f<sup>7</sup>**

40% isolated yield.  $^1\text{H}$  NMR (300 MHz,  $\text{CDCl}_3$ )  $\delta$  7.90-7.85 (m, 2H), 7.77-7.73 (m, 2H), 4.45 (s, 2H), 3.76 (s, 3H);  $^{13}\text{C}$  NMR (75 MHz,  $\text{CDCl}_3$ )  $\delta$  167.8, 167.5, 134.3, 132.1, 123.7, 52.8, 38.9. GC-MS: 219.

**2-Phenylisoindoline-1,3-dione, 2g<sup>5</sup>**

42% isolated yield.  $^1\text{H}$  NMR (400 MHz,  $\text{CDCl}_3$ )  $\delta$  7.98-7.94 (m, 2H), 7.81-7.77 (m, 2H), 7.53-7.39 (m, 5H);  $^{13}\text{C}$  NMR (100 MHz,  $\text{CDCl}_3$ )  $\delta$  167.4, 134.5, 131.9, 131.8, 129.2, 128.2, 126.7, 123.8. GC-MS: 223.

**2-(4-Chlorophenyl)isoindoline-1,3-dione, 2h<sup>5</sup>**

47% isolated yield.  $^1\text{H}$  NMR (300 MHz,  $\text{CDCl}_3$ )  $\delta$  7.98-7.93 (m, 2H), 7.83-7.78 (m, 2H), 7.52-7.46 (m, 2H), 7.44-7.38 (m, 2H);  $^{13}\text{C}$  NMR (100 MHz,  $\text{CDCl}_3$ )  $\delta$  167.1, 134.7, 133.9, 131.7, 130.3, 129.4, 127.8, 124.0. GC-MS: 257.

**2-(4-Isopropylphenyl)isoindoline-1,3-dione, 2i**

30% isolated yield.  $^1\text{H}$  NMR (400 MHz,  $\text{CDCl}_3$ )  $\delta$  7.96-7.94 (m, 2H), 7.80-7.77 (m, 2H), 7.38-7.33 (m, 4H), 3.00-2.94 (m, 1H), 1.29 (d,  $J = 6.9$  Hz, 6H);  $^{13}\text{C}$  NMR

(100 MHz, CDCl<sub>3</sub>)  $\delta$  167.5, 149.0, 134.4, 131.9, 129.3, 127.3, 126.5, 123.9, 34.0, 24.0. GC-MS: 265.

**2-(Naphthalen-2-yl)isoindoline-1,3-dione 2j<sup>9</sup>**

57% isolated yield. <sup>1</sup>H NMR (400 MHz, CDCl<sub>3</sub>)  $\delta$  7.99-7.94(m, 4H), 7.90-7.88 (m, 2H), 7.82-7.79 (m, 5H), <sup>13</sup>C NMR (100 MHz, CDCl<sub>3</sub>)  $\delta$  167.5, 134.5, 133.4, 132.7, 129.2, 129.1, 128.3, 127.8, 126.8, 126.7, 125.6, 124.3, 123.9. GC-MS: 273.

**2-Butyl-5-chloroisoindoline-1,3-dione, 2k**

48% isolated yield. <sup>1</sup>H NMR (400 MHz, CDCl<sub>3</sub>)  $\delta$  7.79-7.75 (m, 2H), 7.65 (q, *J* = 7.8 Hz, 1.8 Hz, 1H), 3.67 (t, *J* = 7.3 Hz, 2H), 1.68-1.60 (m, 2H), 1.40-1.30 (m, 2H), 0.93 (t, *J* = 7.6 Hz, 3H); <sup>13</sup>C NMR (100 MHz, CDCl<sub>3</sub>)  $\delta$  167.5, 167.2, 140.6, 133.9, 130.3, 124.4, 123.7, 38.1, 30.6, 20.1, 13.6. GC-MS: 237.

**2-Methyl-1H-benzo[de]isoquinoline-1,3(2H)-dione, 2l<sup>10</sup>**

75% isolated yield. <sup>1</sup>H NMR (300 MHz, CDCl<sub>3</sub>)  $\delta$  8.50 (d, *J* = 7.2 Hz, 2H), 8.13 (d, *J* = 8.3 Hz, 2H), 7.68 (dd, *J* = 8.3, 7.2 Hz, 2H), 3.50 (s, 3H); <sup>13</sup>C NMR (75 MHz, CDCl<sub>3</sub>)  $\delta$  164.4, 133.9, 131.5, 131.2, 128.0, 126.9, 122.5, 27.0. GC-MS: 211.

***General procedure for preparation of TPD***

To a solution of Cp<sub>2</sub>ZrCl<sub>2</sub> (702 mg, 2 mmol) in 10 mL of THF, BuLi (1.6 M in hexane, 4.8 mmol), was added at -78 °C and the mixture was stirred for 1 h at the same temperature. To this solution, N,N-bis(3-phenylprop-2-yn-1-yl)butan-1-amine (2.0 mmol) was added and stirred for 3 h at room temperature. Then, S<sub>2</sub>Cl<sub>2</sub> (3 mmol) was added and stirred overnight. The reaction mixture was quenched by water and extracted by ethyl acetate. The organic extract was dried over MgSO<sub>4</sub>. Removing the solvent and subsequent purification by column chromatography on silica gel afforded **3a** in 64% isolated yield.<sup>11</sup> **3b** was prepared in 57% isolated yield by using similar procedure with N,N-bis(3-(thiophen-2-yl)prop-2-yn-1-yl)butan-1-amine as starting material.

To a 25 mL tube with teflon-coated magnetic stir bar and a rubber septum, was added **3** (0.4 mmol), CuCl (0.04 mol), CH<sub>2</sub>Cl<sub>2</sub> 1 mL, TBHP (4 mmol, 70% in water). The tube was sealed and stirred for 24 h at 50°C. The reaction mixture was quenched by water and extracted by ethyl acetate. The organic extract was dried over MgSO<sub>4</sub>.

Removing the solvent and subsequent purification by column chromatography on  $\text{Al}_2\text{O}_3$  afforded **4**.

**5-Butyl-1,3-diphenyl-4H-thieno[3,4-c]pyrrole-4,6(5H)-dione, 4a.**

82% isolated yield.  $^1\text{H}$  NMR (400 MHz,  $\text{CDCl}_3$ )  $\delta$  8.14-8.12 (m, 4H), 7.50-7.41 (m, 6H), 3.68 (t,  $J = 7.3$  Hz, 2H), 1.71-1.63 (m, 2H), 1.42-1.36 (m, 2H), 0.95 (t,  $J = 7.3$  Hz, 3H);  $^{13}\text{C}$  NMR (100 MHz,  $\text{CDCl}_3$ )  $\delta$  163.1, 145.1, 130.7, 130.5, 130.2, 129.1, 128.2, 38.4, 30.6, 20.3, 13.8. HRMS calcd for  $\text{C}_{22}\text{H}_{19}\text{NO}_2\text{S}$  361.1136, found 361.1131.

**5-Octyl-1,3-di(thiophen-2-yl)-4H-thieno[3,4-c]pyrrole-4,6(5H)-dione, 4b.**

55% isolated yield.  $^1\text{H}$  NMR (300 MHz,  $\text{CDCl}_3$ )  $\delta$  8.01 (d,  $J = 3.8$  Hz, 2H), 7.43 (d,  $J = 5.2$  Hz, 2H), 7.14-7.10 (m, 2H), 3.66 (t,  $J = 7.2$  Hz, 2H), 1.72-1.63 (m, 2H), 1.42-1.20 (m, 10H), 0.87 (t,  $J = 6.6$  Hz, 3H);  $^{13}\text{C}$  NMR (75 MHz,  $\text{CDCl}_3$ )  $\delta$  162.7, 136.6, 132.5, 130.0, 128.7, 128.5, 38.7, 31.9, 29.3, 29.2, 28.6, 27.0, 22.7, 14.2. HRMS calcd for  $\text{C}_{22}\text{H}_{23}\text{NO}_2\text{S}_3$  429.0891, found 429.0893.

## Proposed mechanism

Based on the results, a plausible mechanism was proposed as follow. Firstly, amine **1** was oxidized to radical cation **7** in the present of TBHP and CuCl. **7** was further oxidized to iminium **8**. **8** reacted with water to yield compound **9**, which was then oxidized to amide **10**. **10** was further oxidized to form **11**, which reacted with TBHP to give **12**. Oxidation of **12** afforded imide **13**.

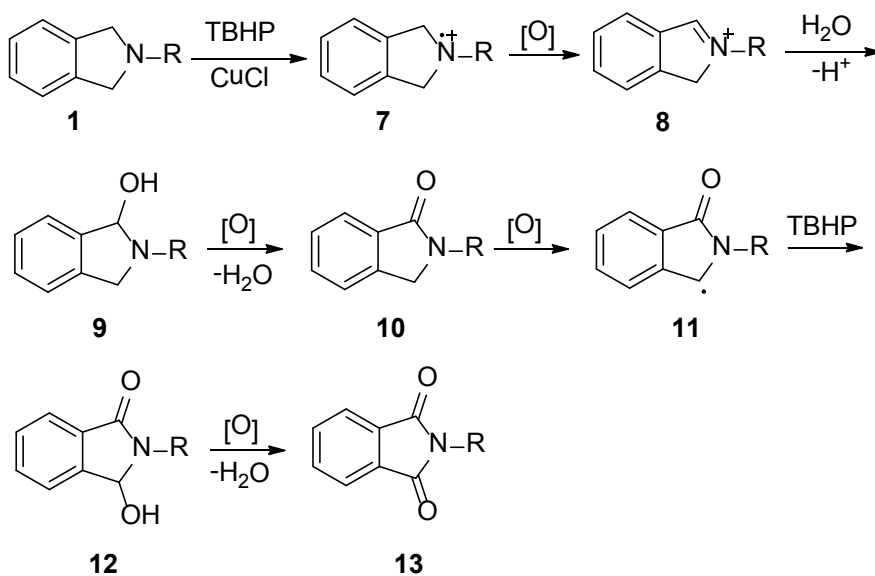

## References

1. D. Hou, M. Wang, M. Chung, Y. Hsieh and H. Gavin, *J. Org. Chem.*, 2007, **72**, 9231.
2. F. N. Murigi, G. S. Nichol and E. A. Mash, *J. Org. Chem.*, 2010, **75**, 1293.
3. A. Subbarayappa and P. U. Patoliya, *Indian J. Chem. B*, 2009, **48B**, 545
4. N. Uhlig and C. Li, *Org. Lett.*, 2012, **14**, 3000.
5. J. Hsieh and C. Cheng, *Chem. Commun.*, 2005, 4554.
6. K. Asano and S. Matsubara, *Heterocycles*, 2010, **80**, 989.
7. D. Marosvoelgyi-Hasko, A. Petz, A. Takacs and L. Kollar, *Tetrahedron*, 2011, **67**, 9122.
8. V. Pace, P. Hoyos, M. Fernandez, J. V. Sinisterra and A. R. Alcantara, *Green Chem*, 2010, **12**, 1380.
9. H. J. Kim, J. Kim, S. H. Cho and S. Chang, *J. Am. Chem. Soc.*, 2011, **133**, 16382.
10. A. Takacs, A. Petz and L. Kollar, *Tetrahedron*, 2010, **66**, 4479.
11. P. J. Fagan and W. A. Nugent, *J. Am. Chem. Soc.*, 1988, **110**, 2310



X-ray structure of **4a**

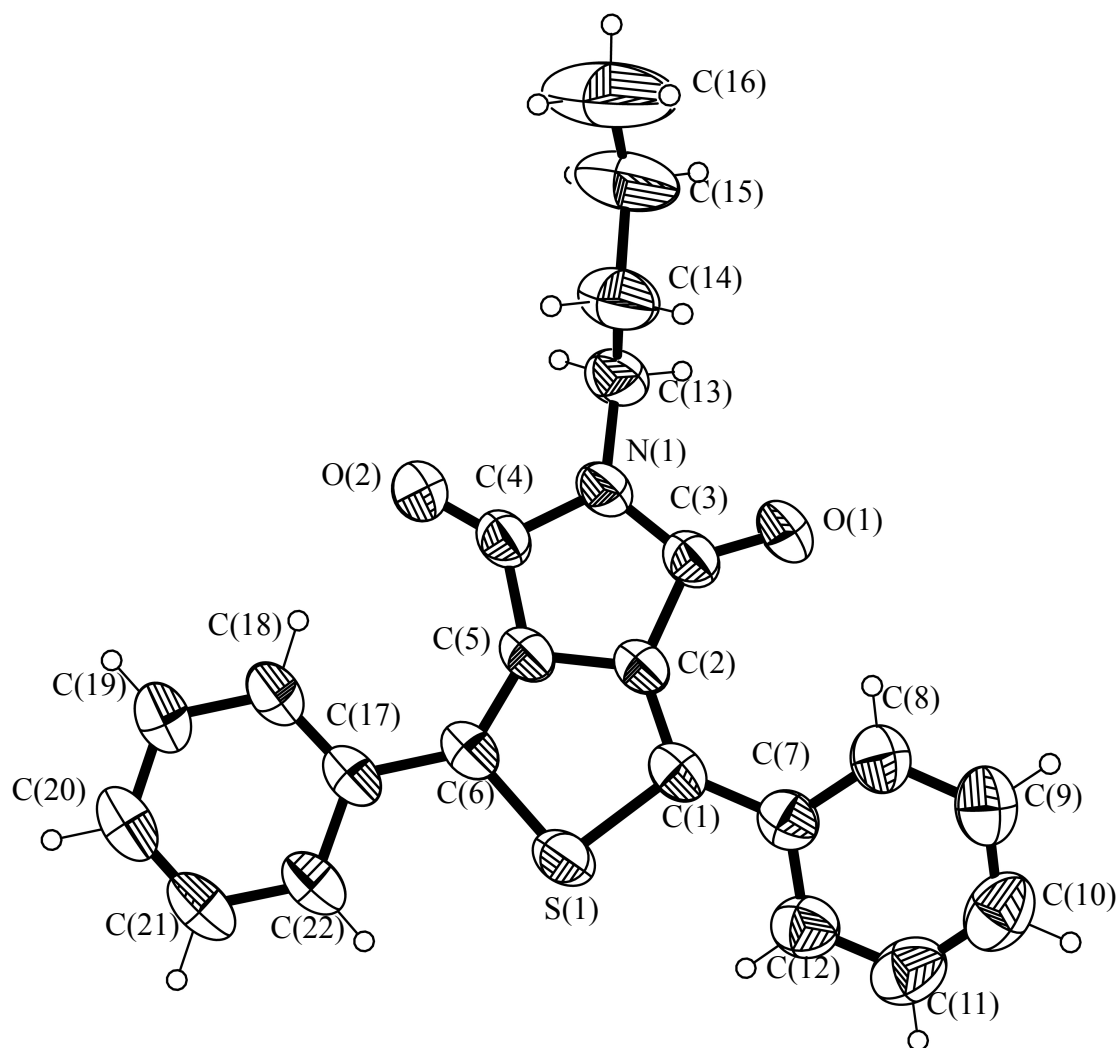

ORTEP drawing of  $C_{22}H_{19}NO_2S$  with 35% probability ellipsoids, showing the atomic numbering scheme.

### Copies of $^1\text{H}$ and $^{13}\text{C}$ NMR Spectra

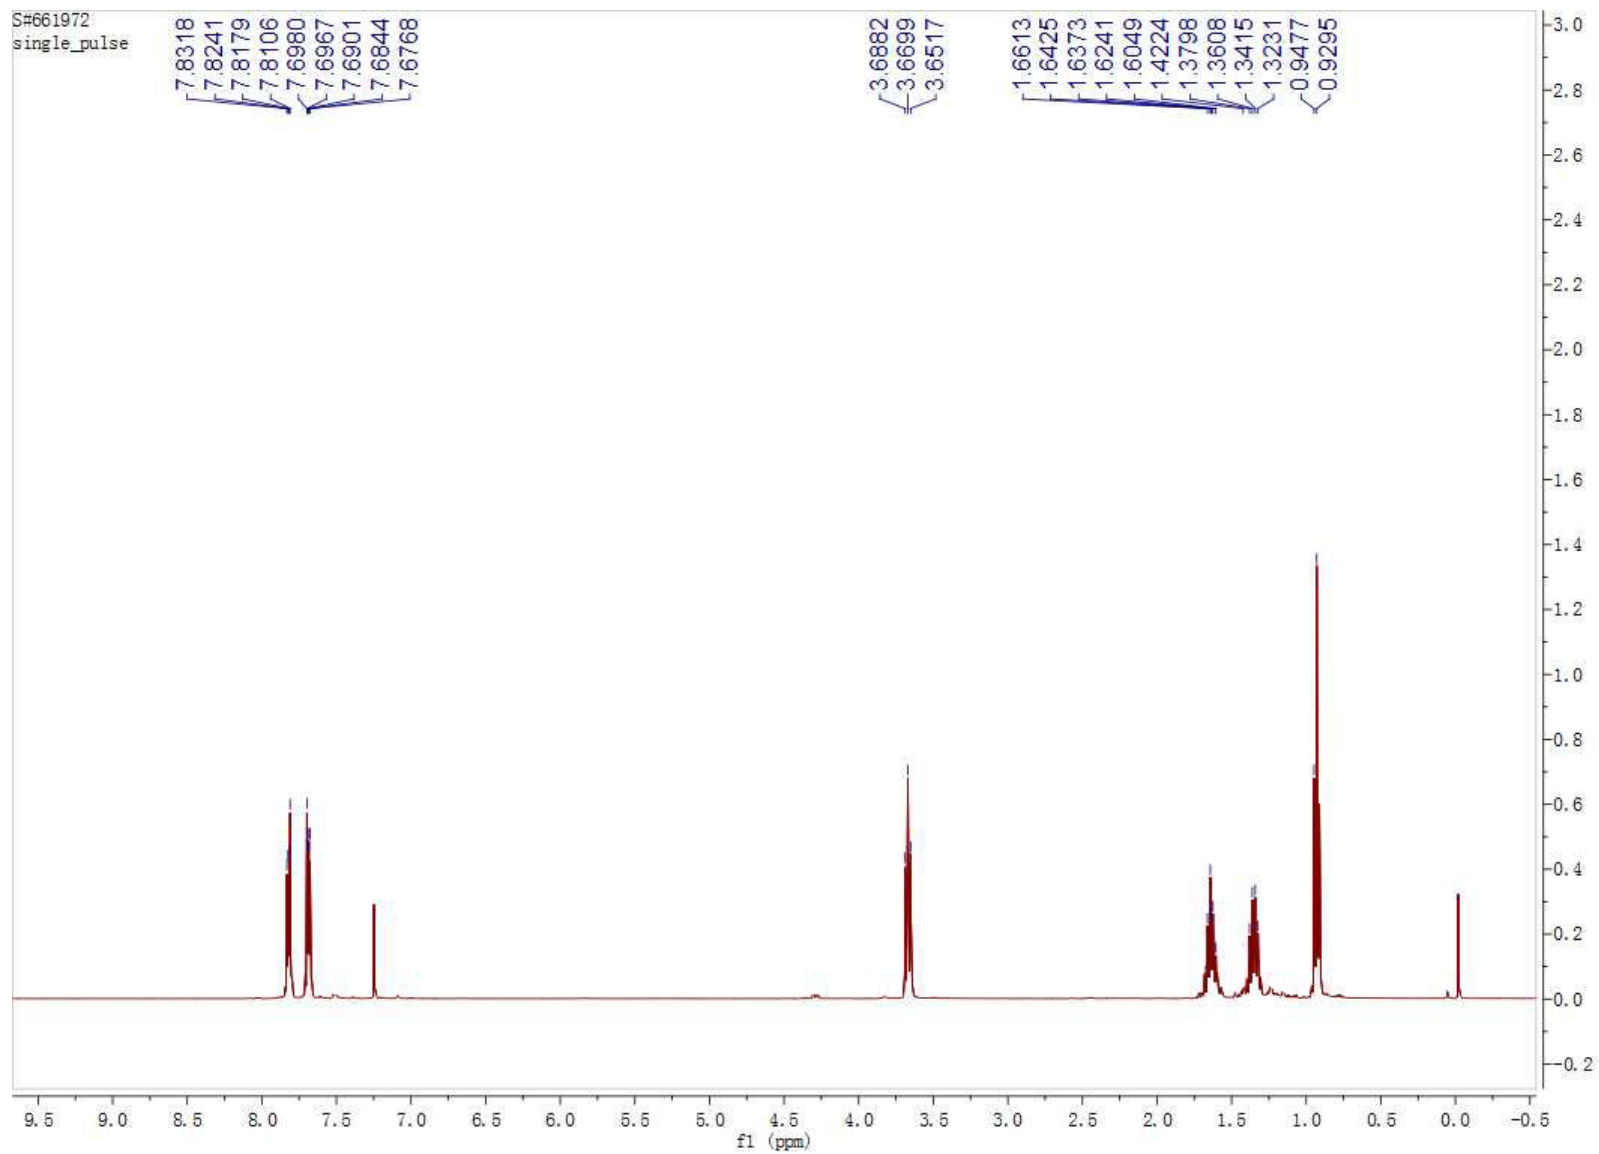

$^1\text{H}$  NMR for compound **2a**

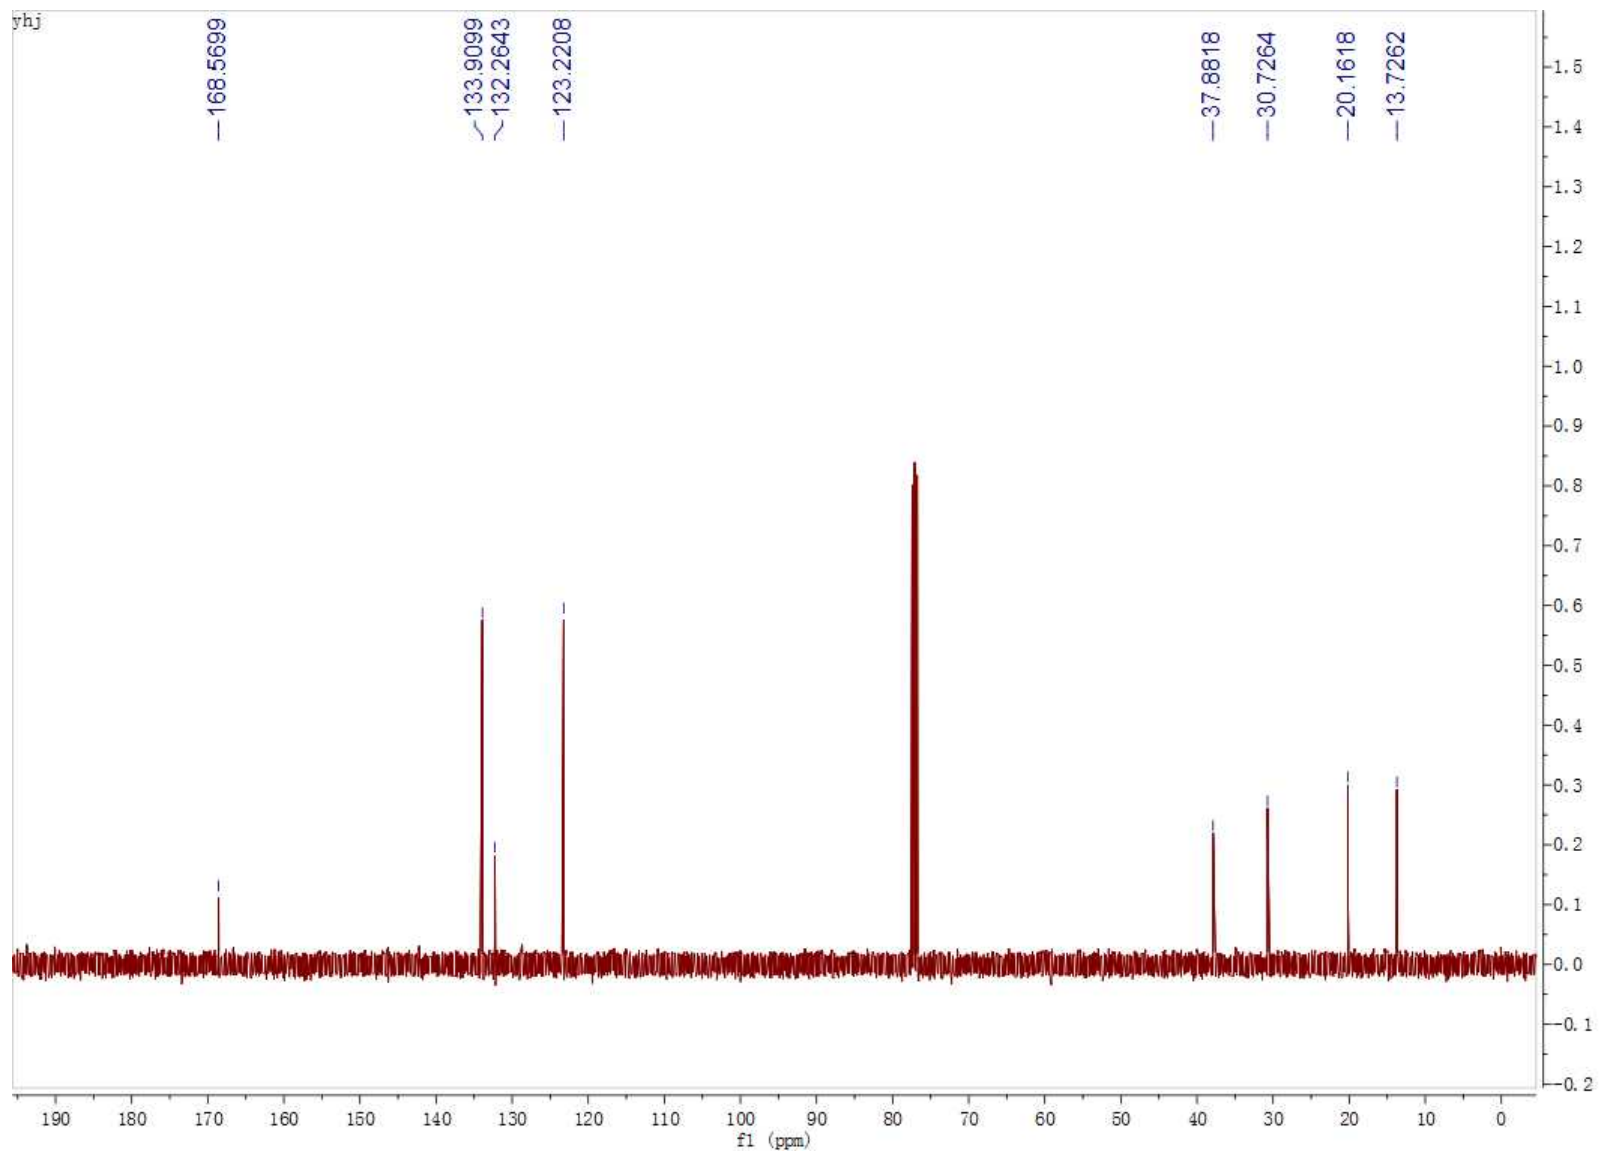

<sup>13</sup>C NMR for compound 2a

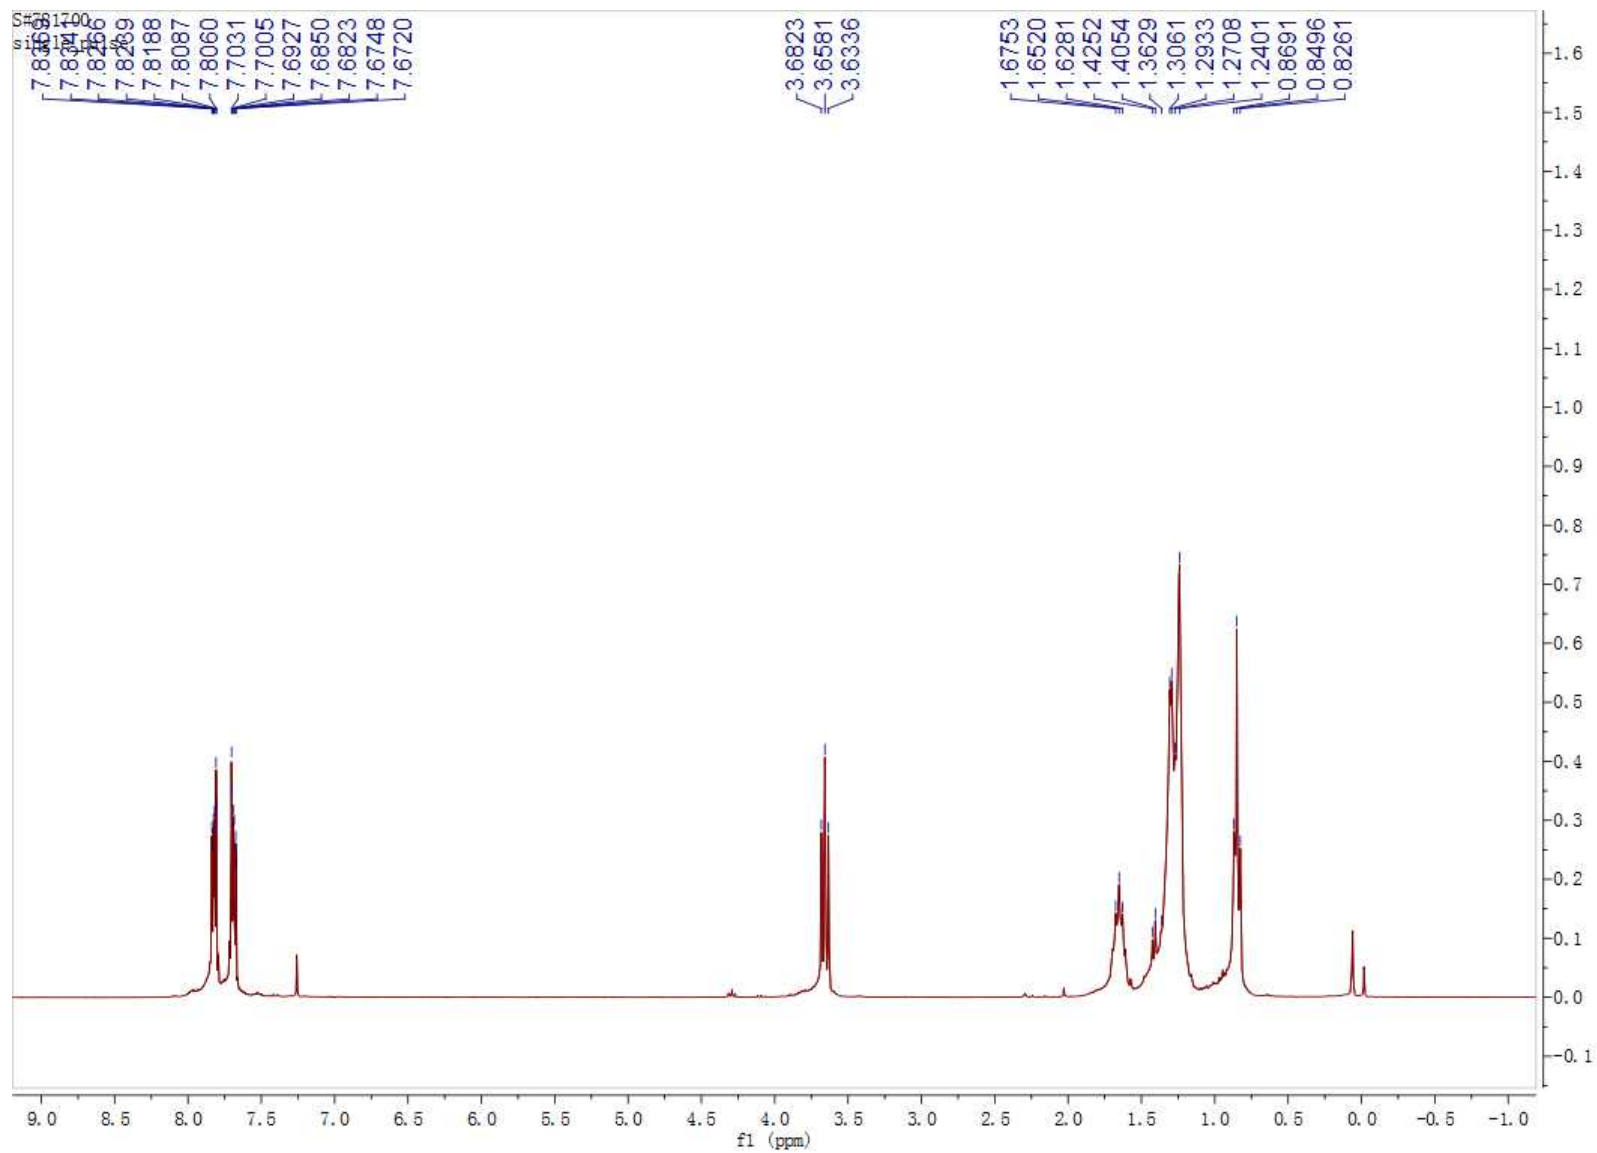

$^1\text{H}$  NMR for compound **2b**

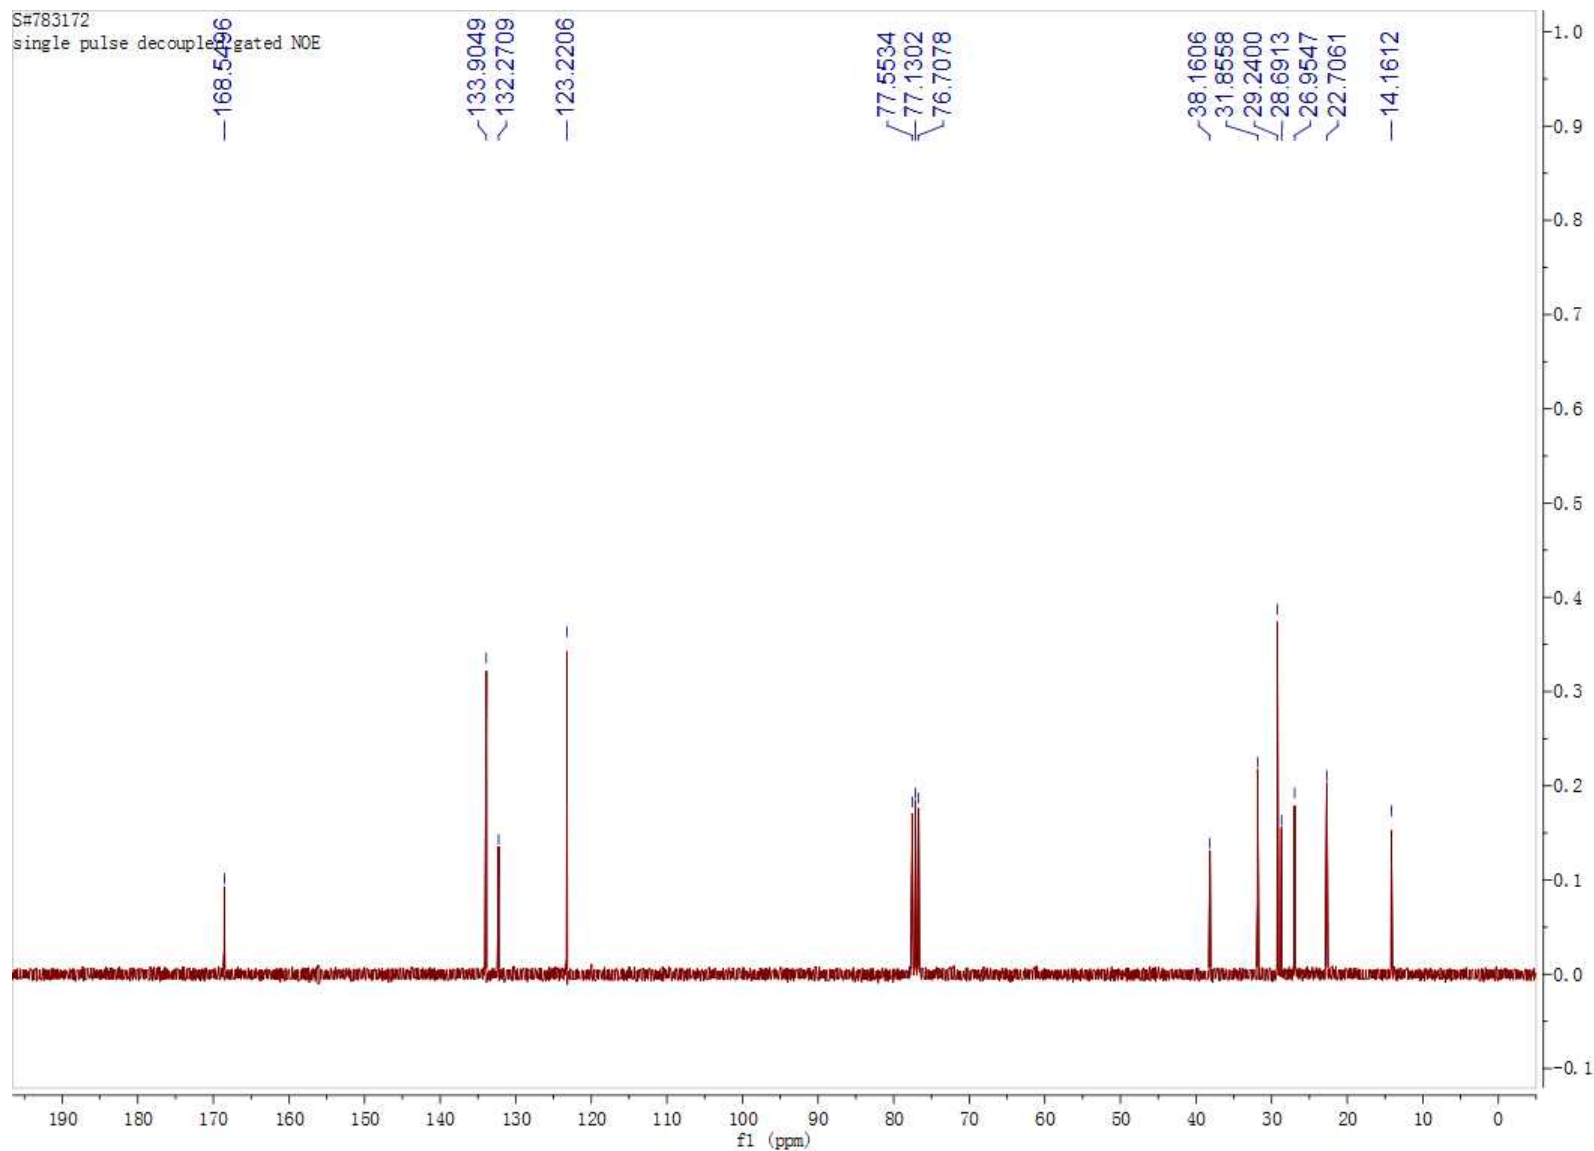

$^{13}\text{C}$  NMR for compound **2b**

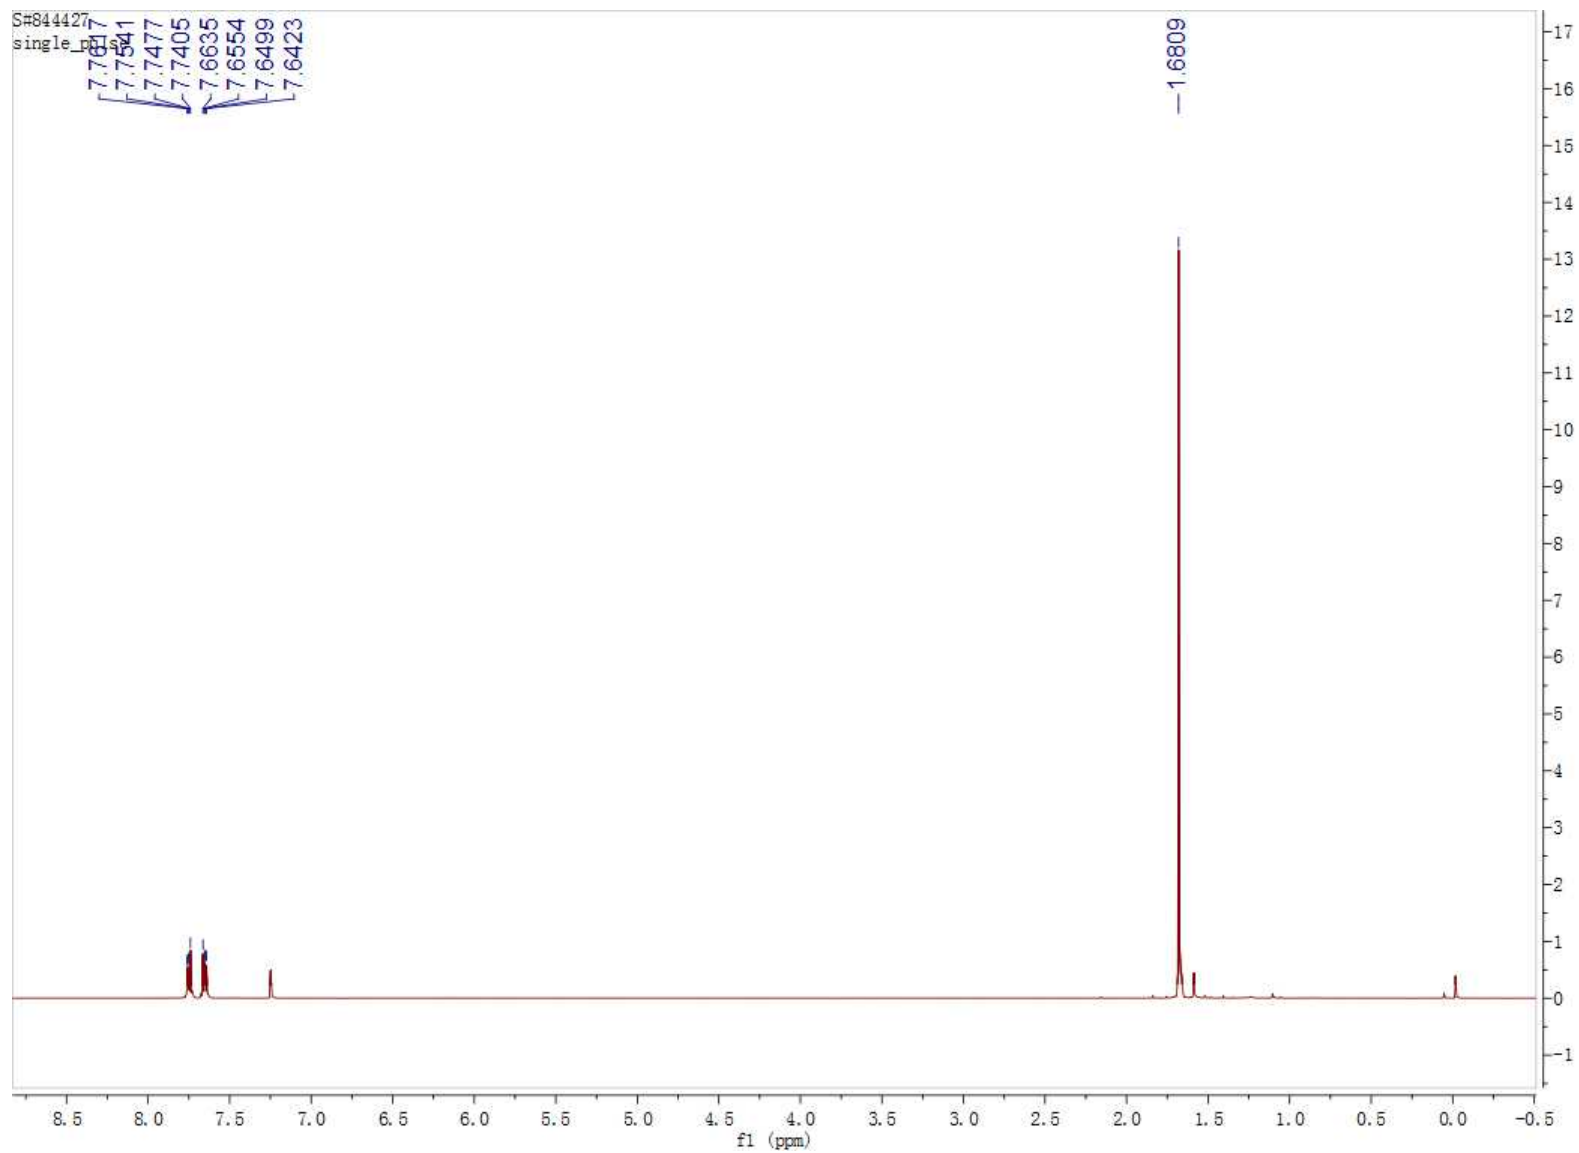

$^1\text{H}$  NMR for compound **2c**

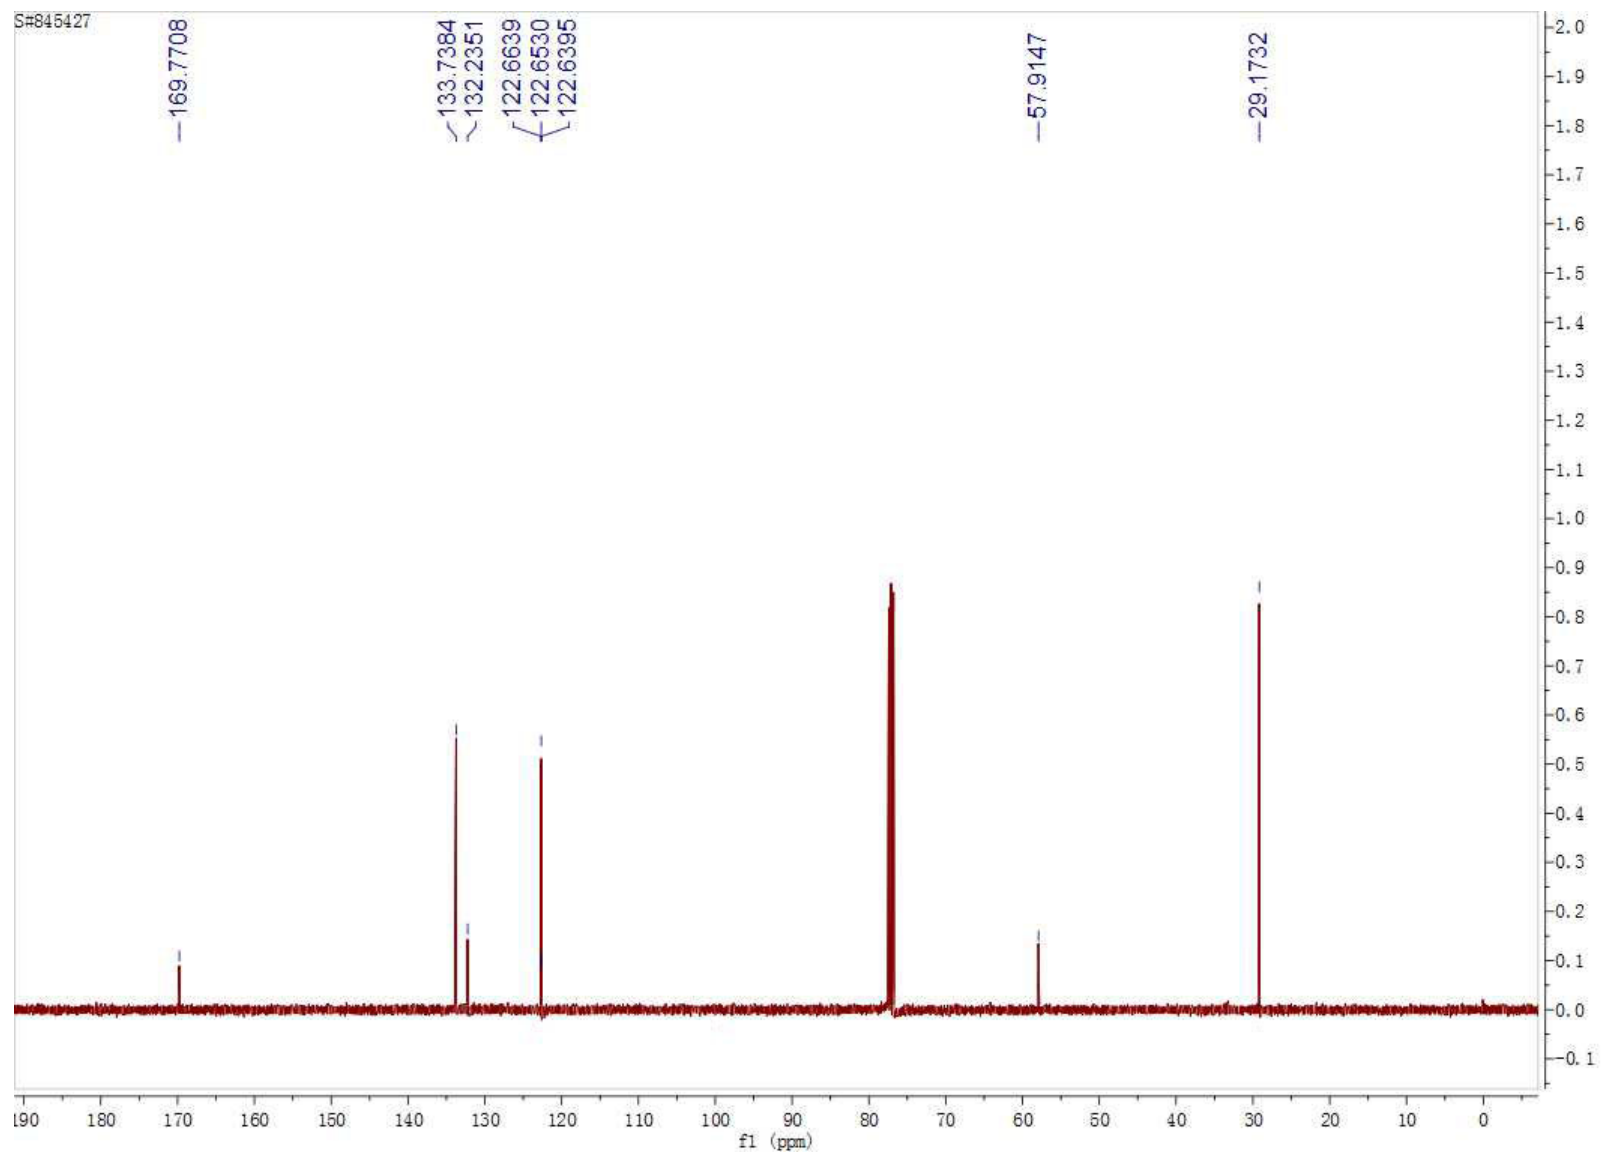

$^{13}\text{C}$  NMR for compound 2c

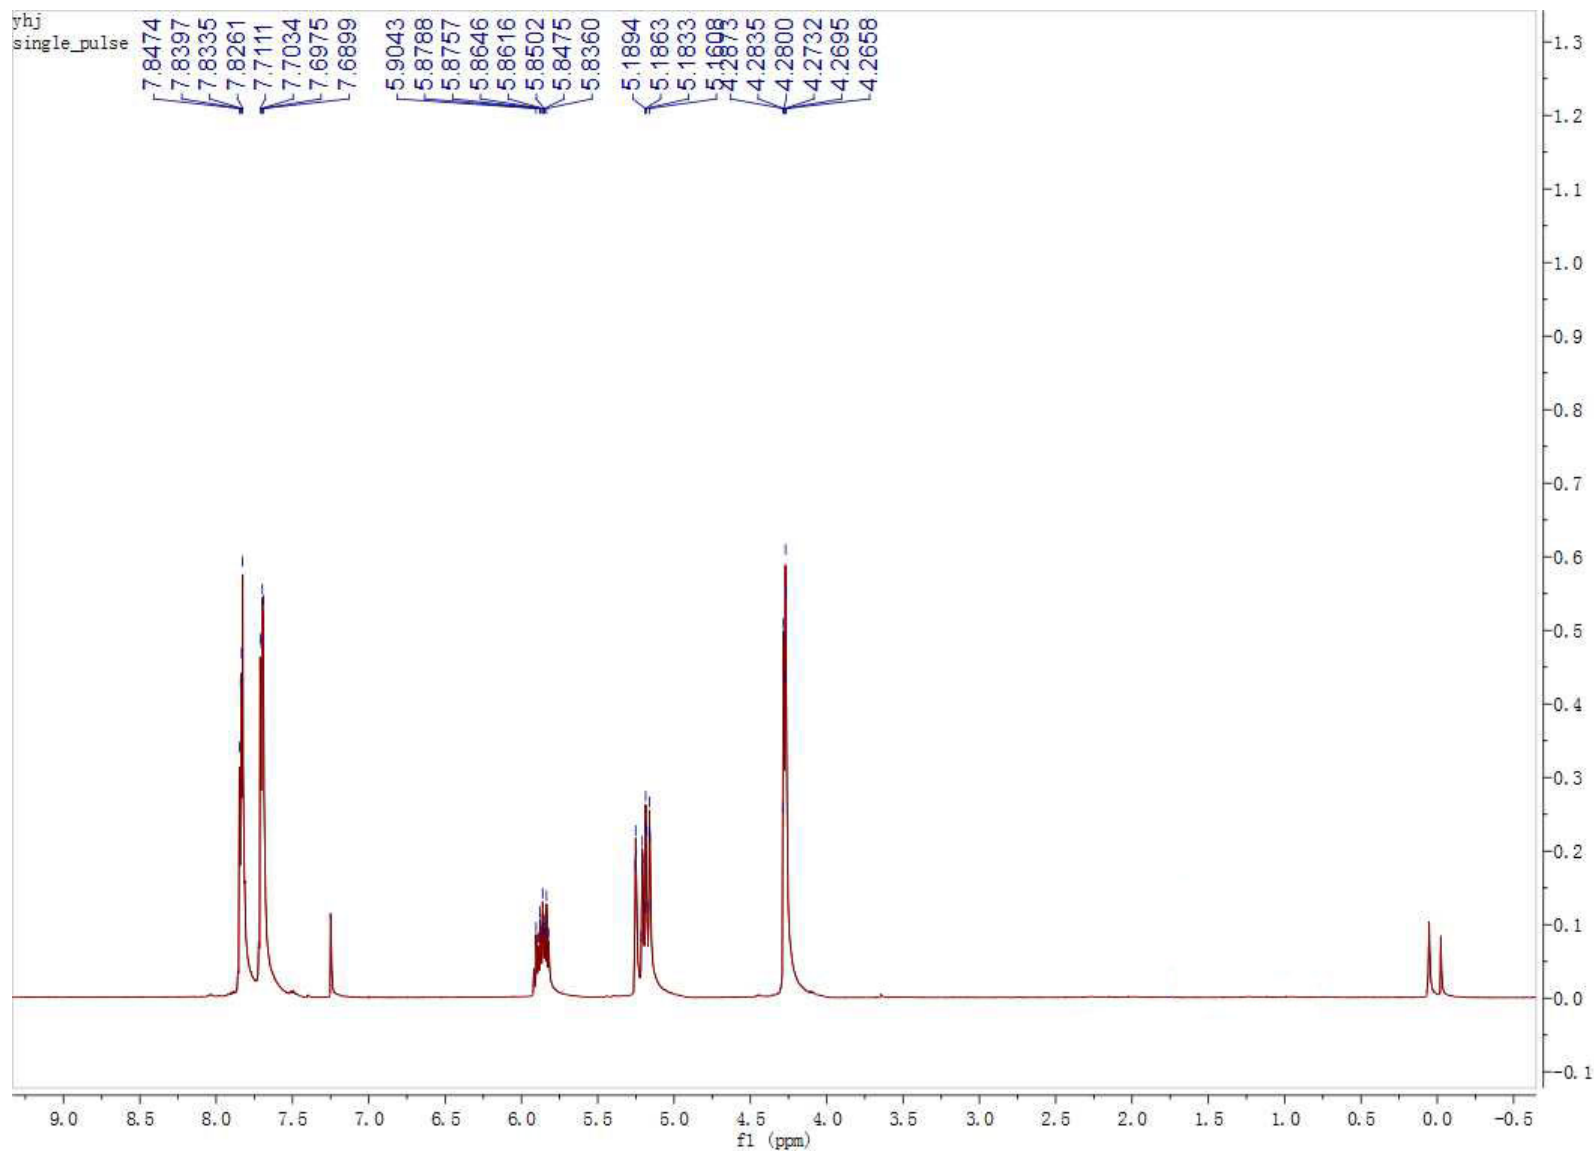

<sup>1</sup>H NMR for compound 2d



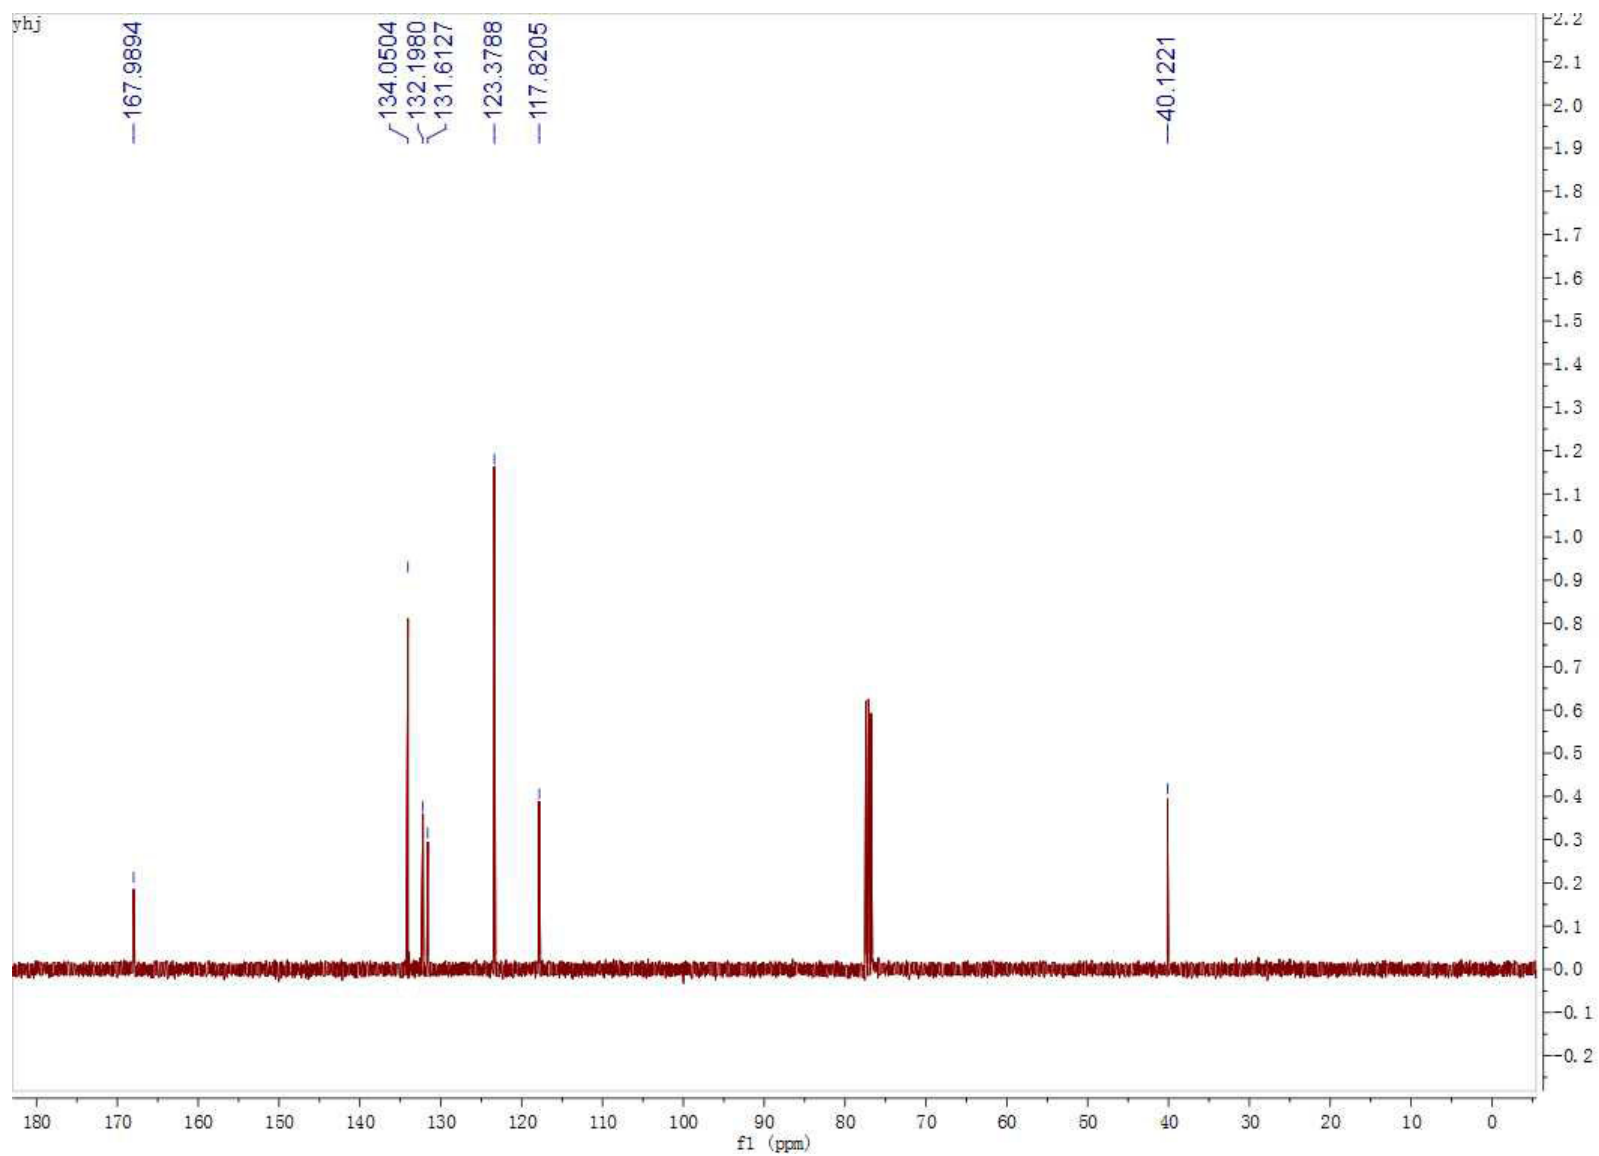

$^{13}\text{C}$  NMR for compound **2d**

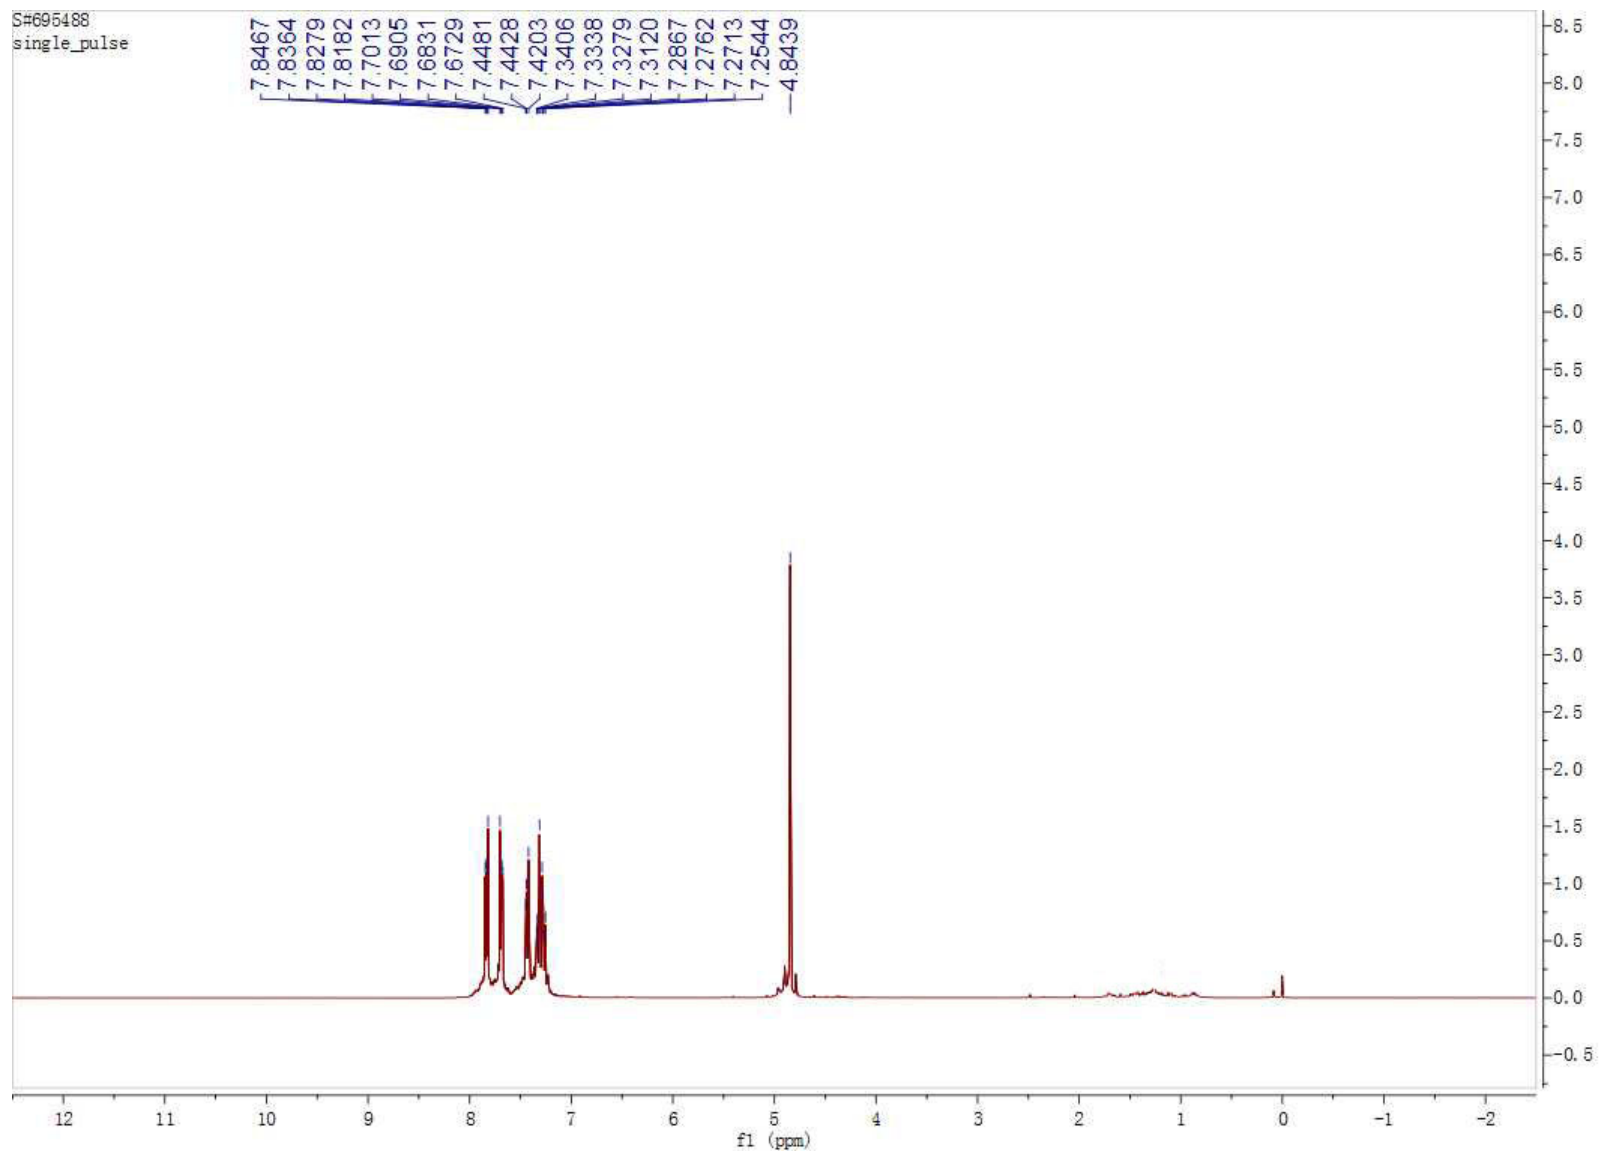

$^1\text{H}$  NMR for compound **2e**

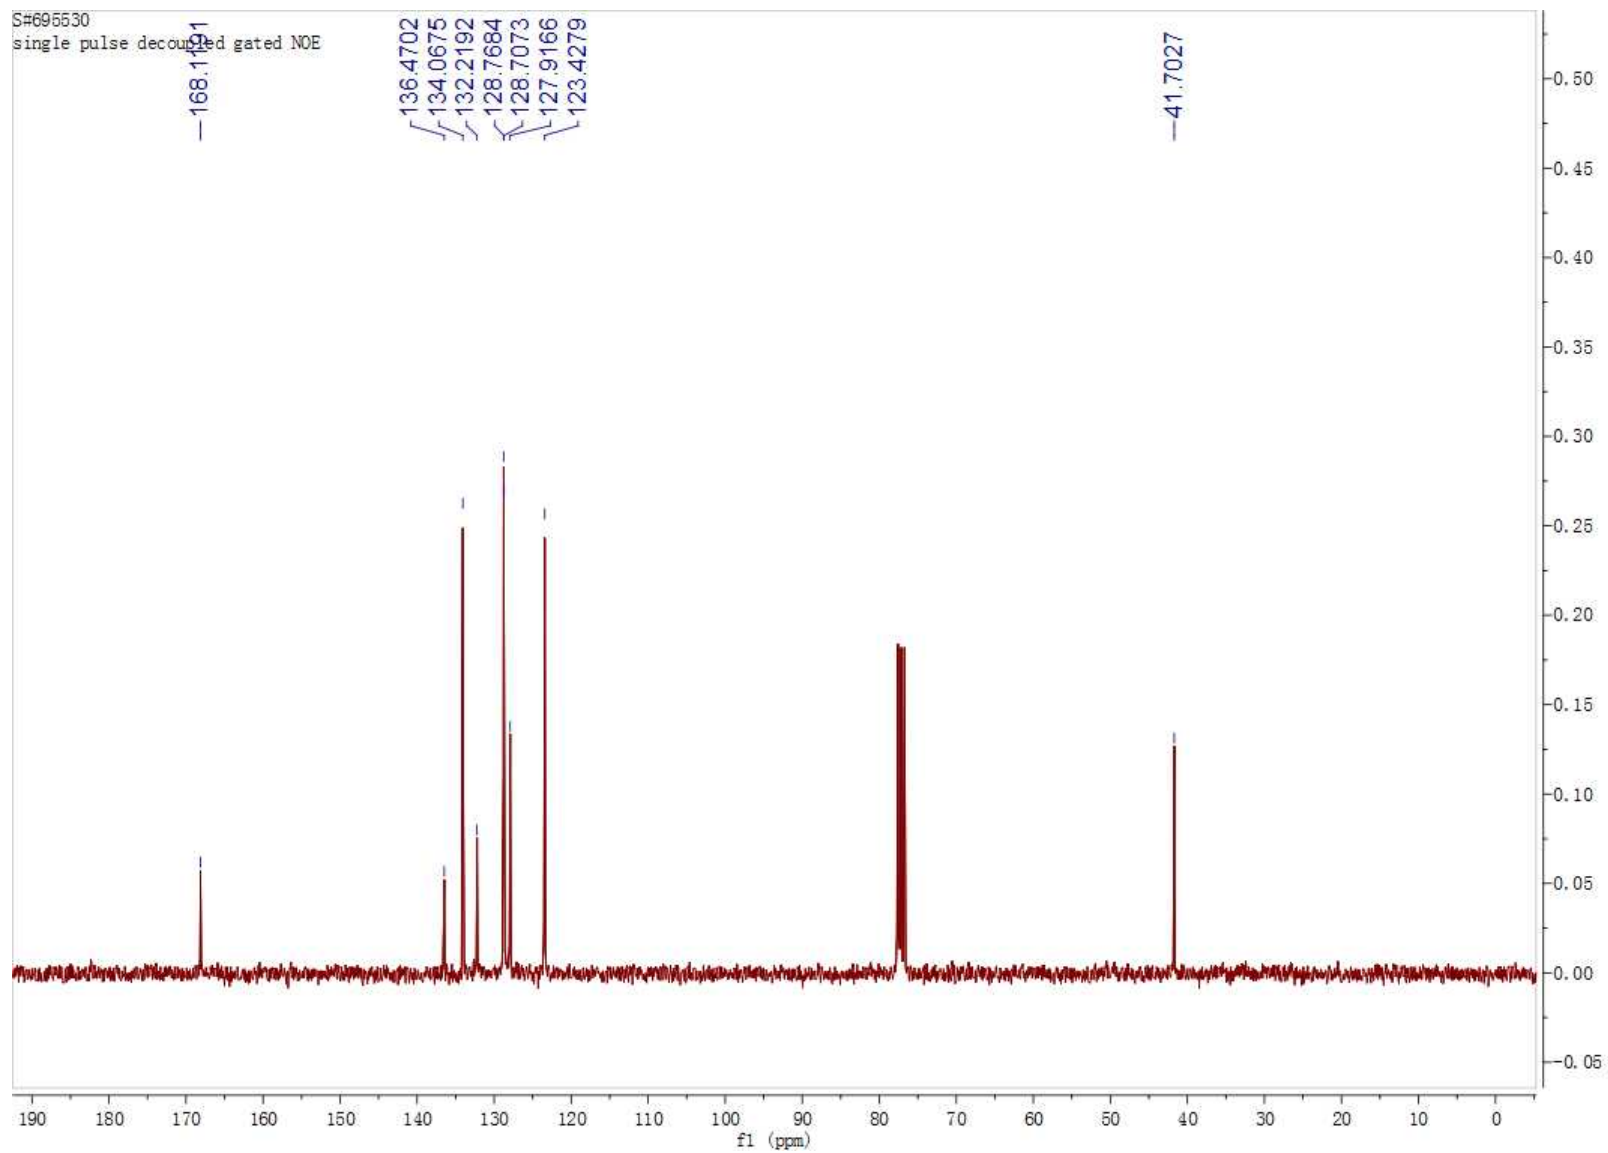

<sup>13</sup>C NMR for compound 2e

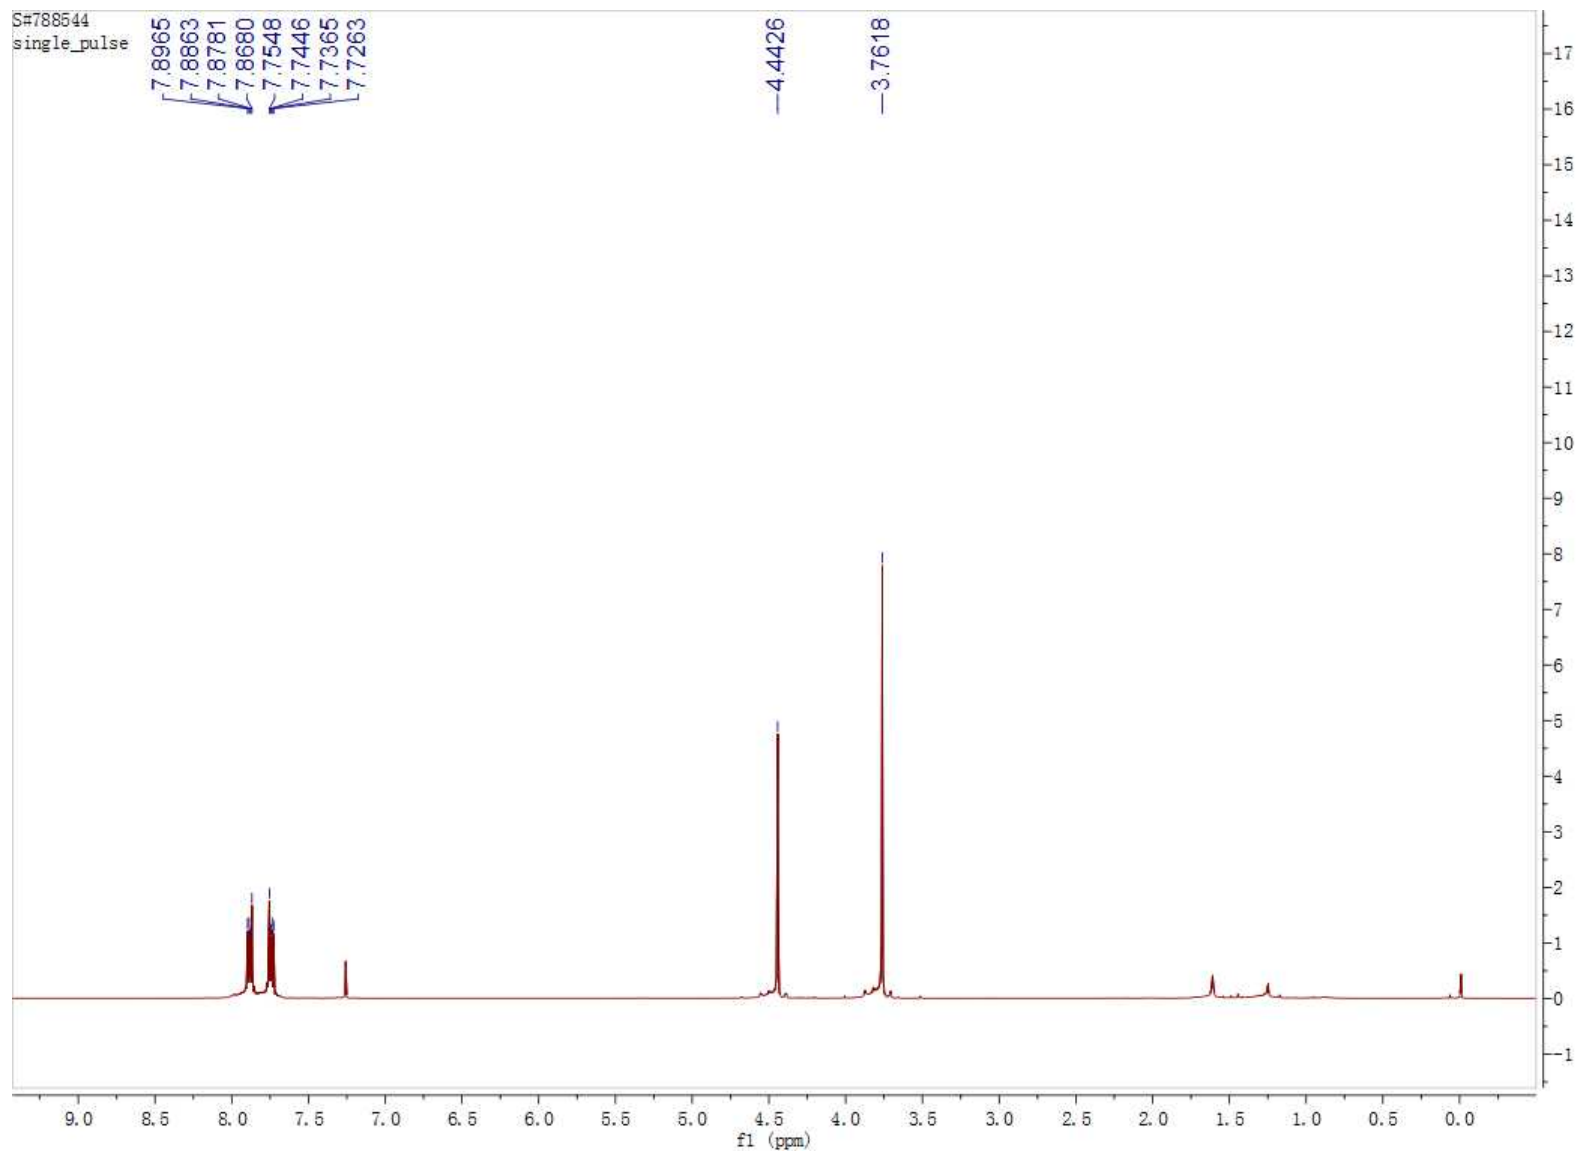

$^1\text{H}$  NMR for compound **2f**

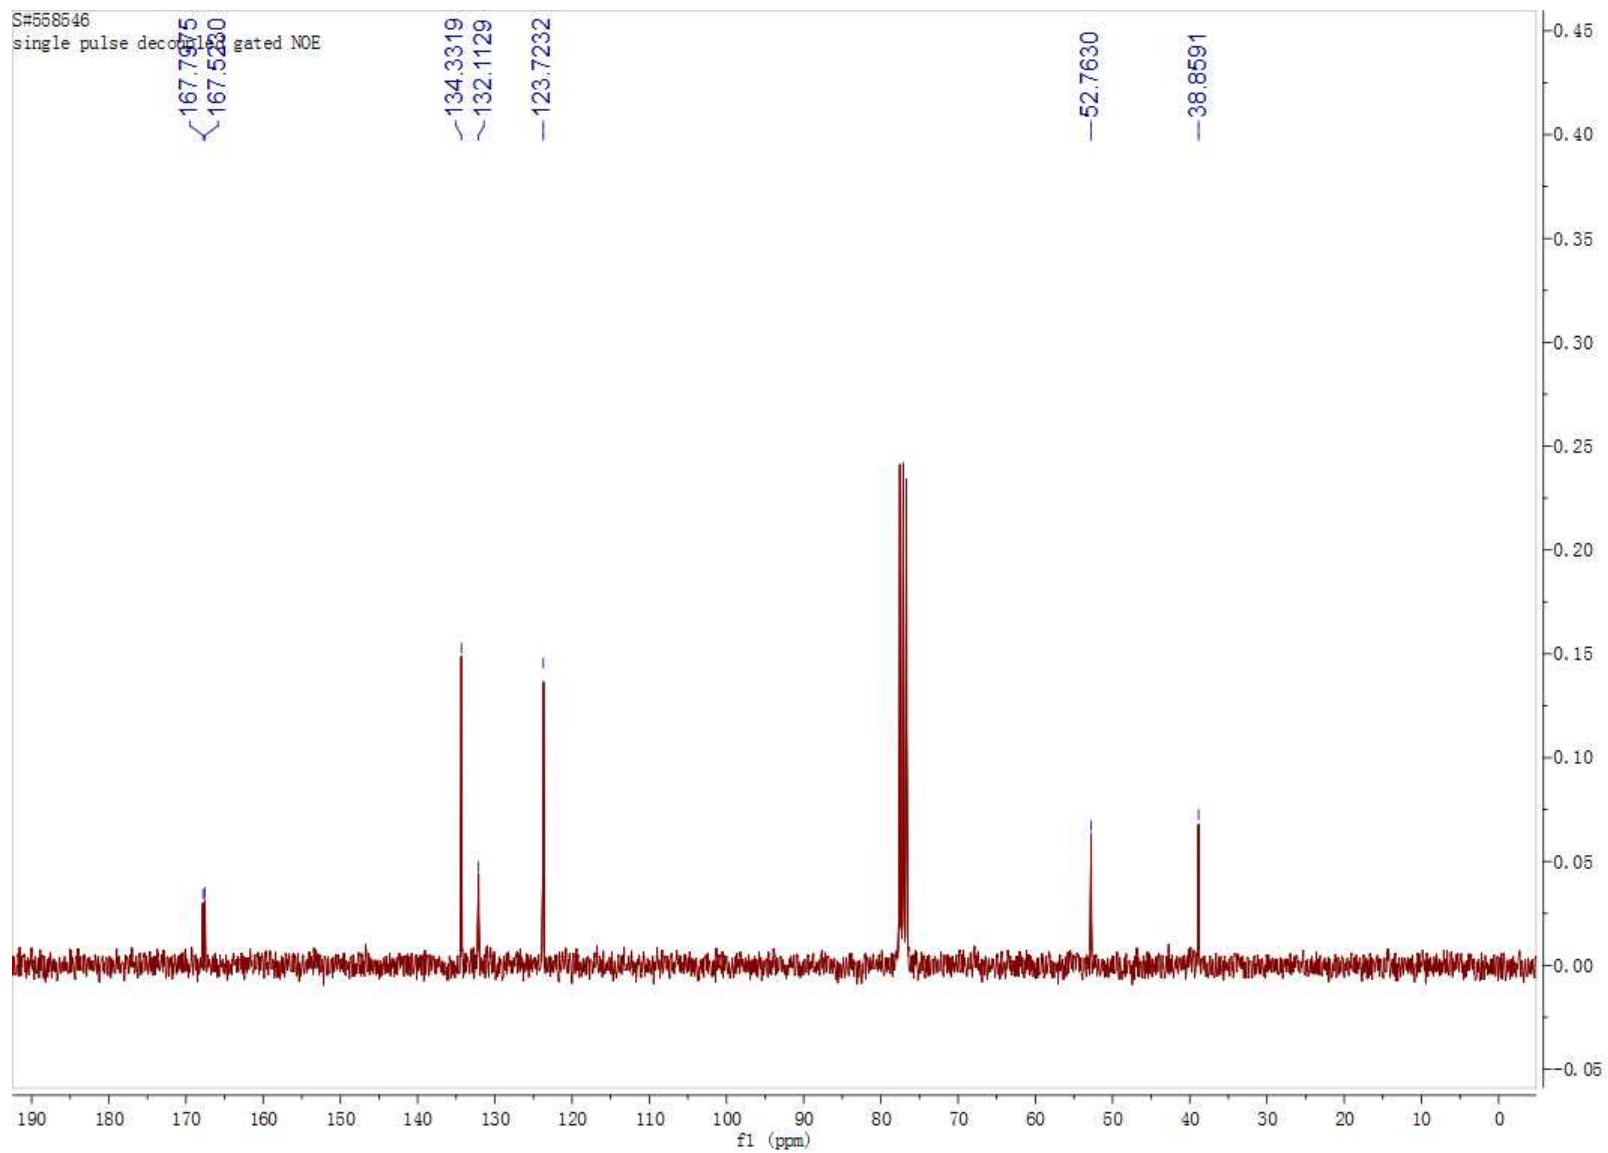

$^{13}\text{C}$  NMR for compound **2f**

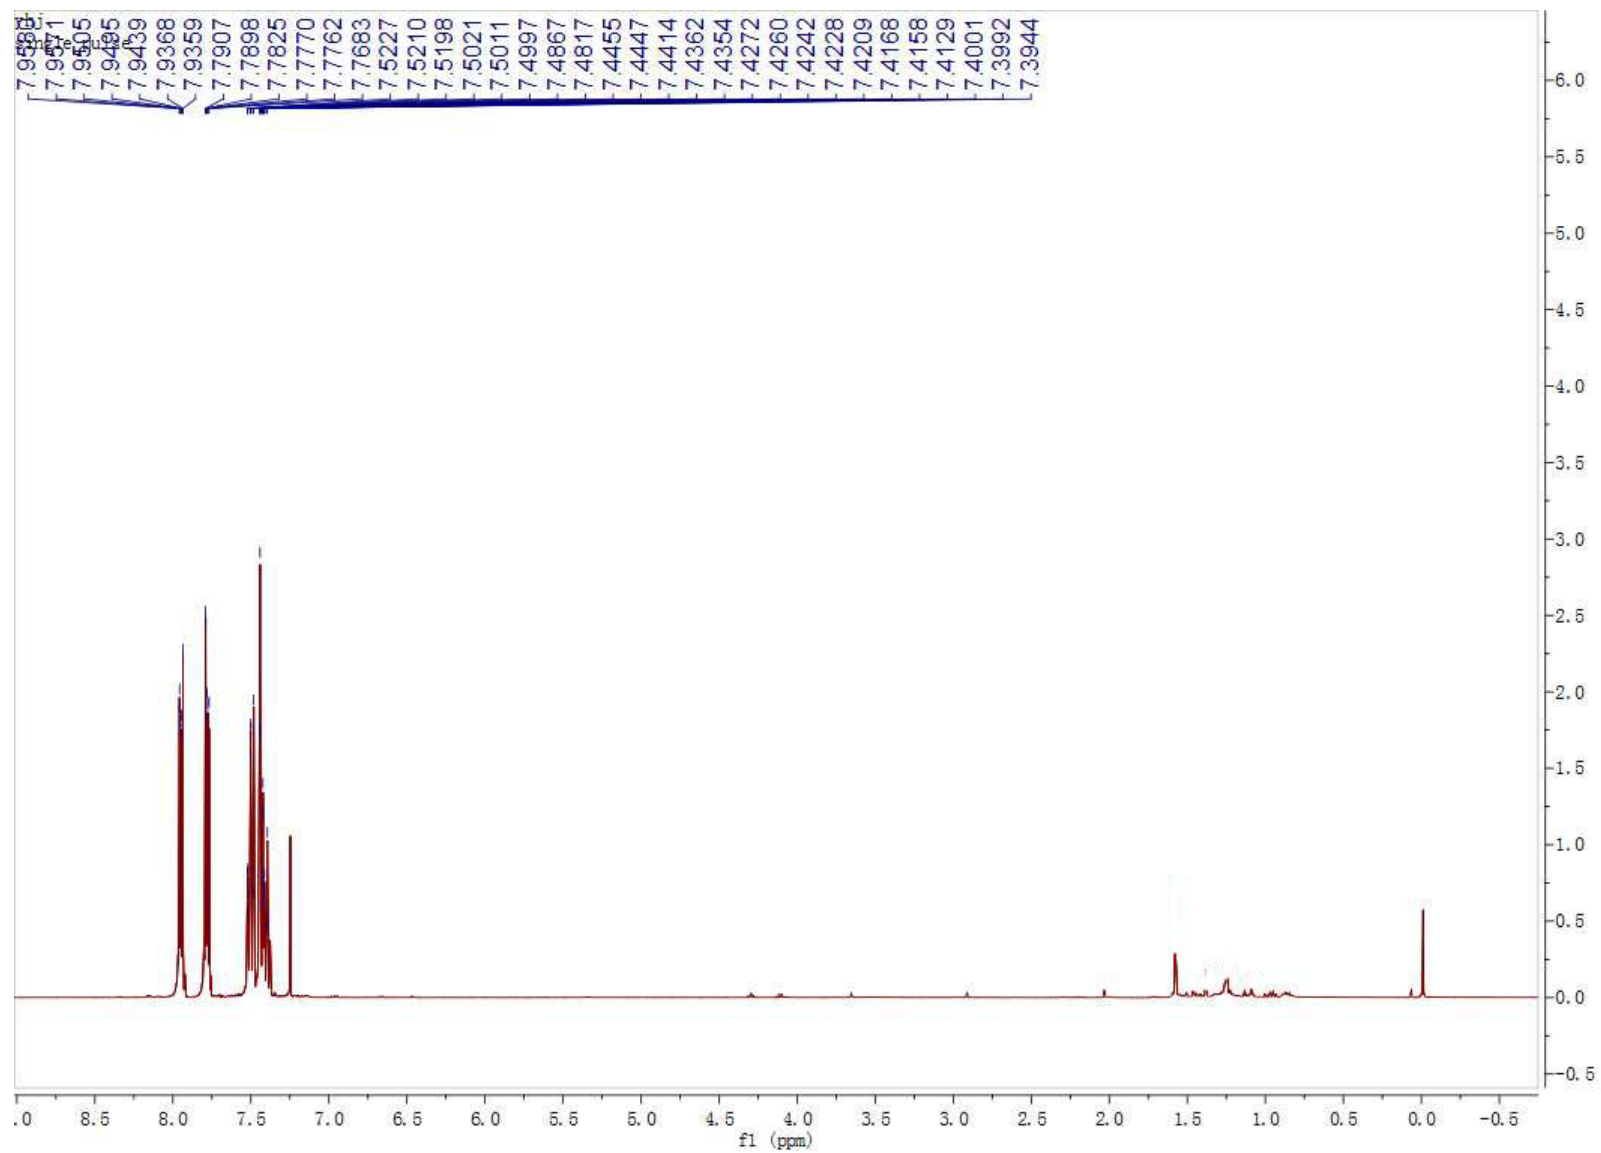

$^1\text{H}$  NMR for compound **2g**

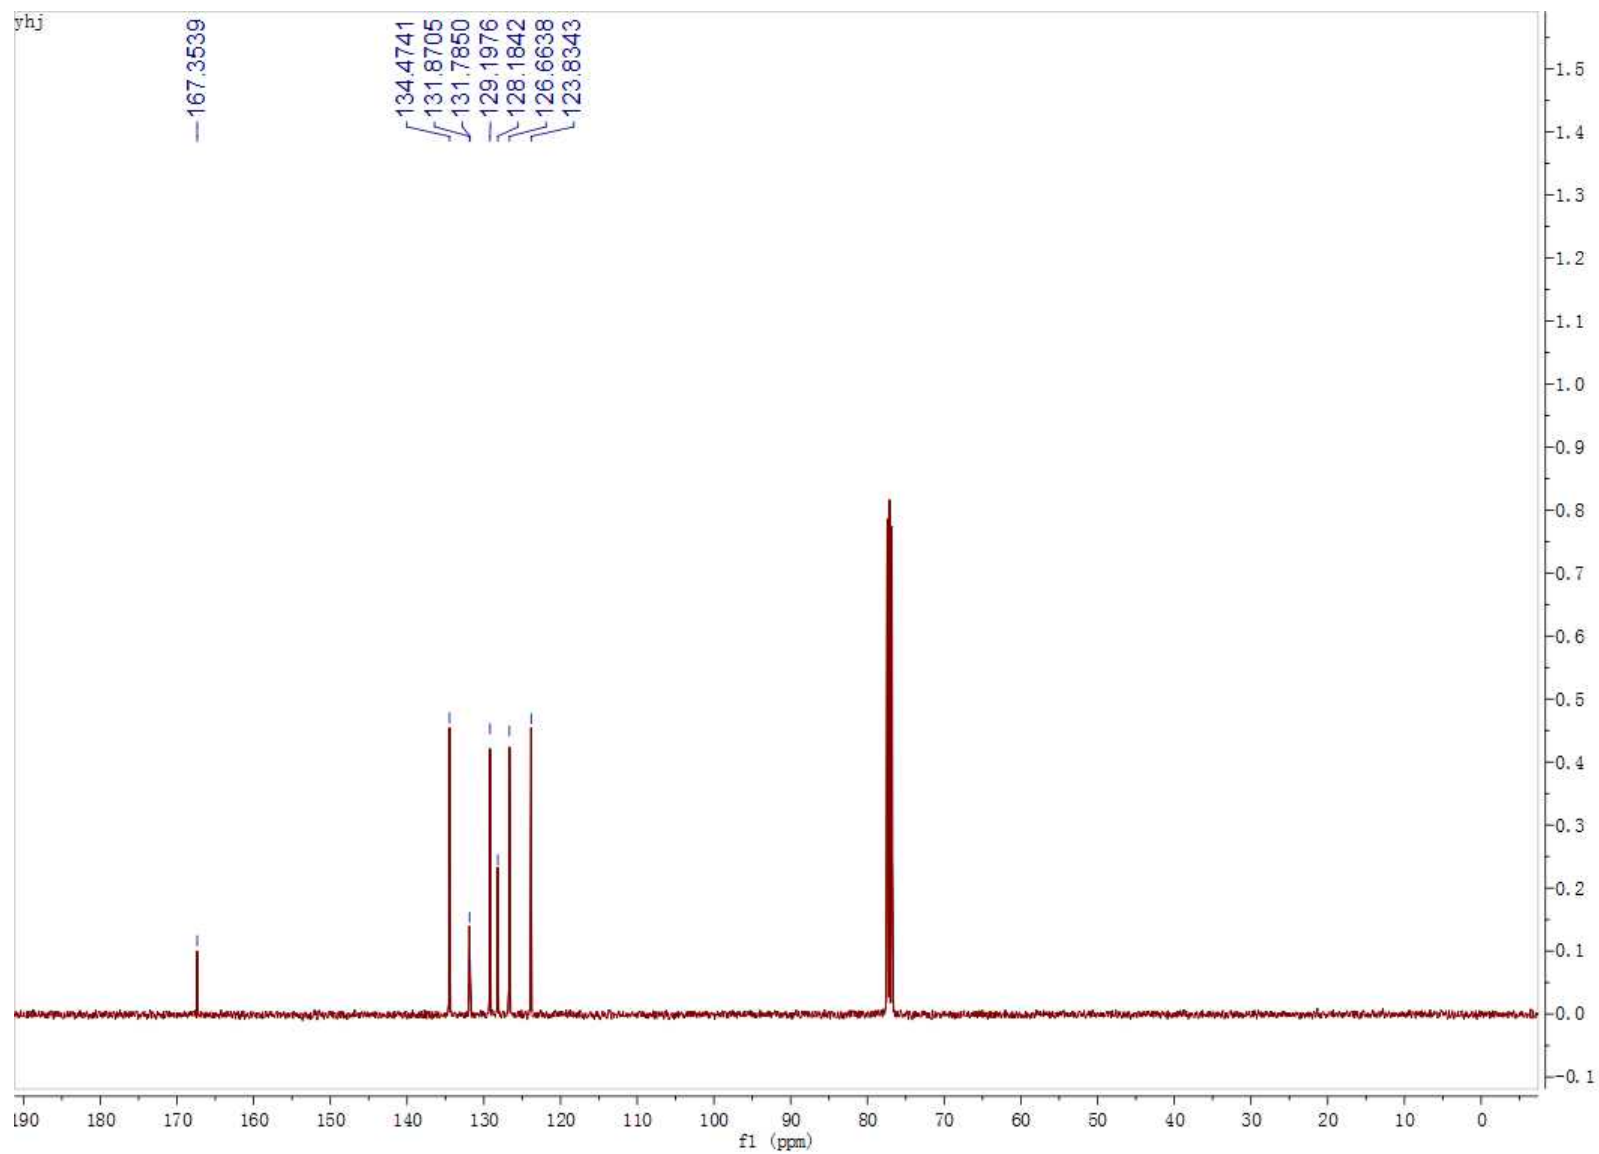

<sup>13</sup>C NMR for compound **2g**

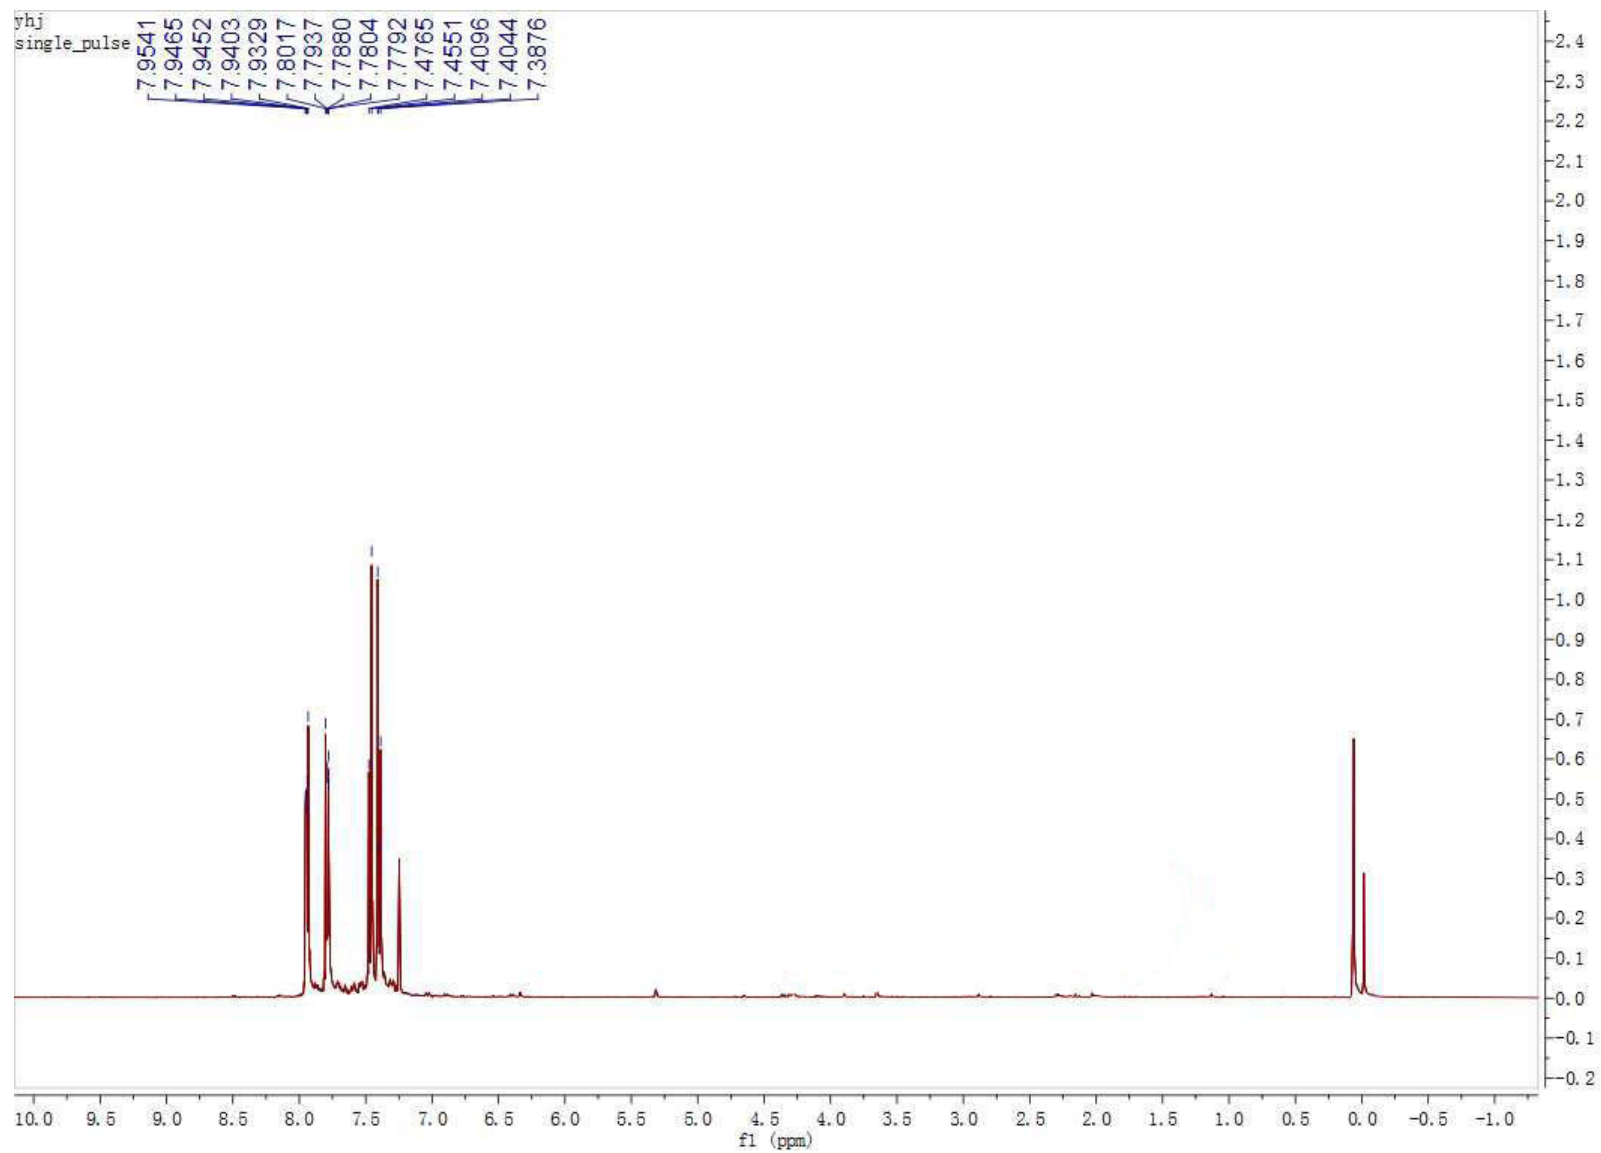

<sup>1</sup>H NMR for compound **2h**



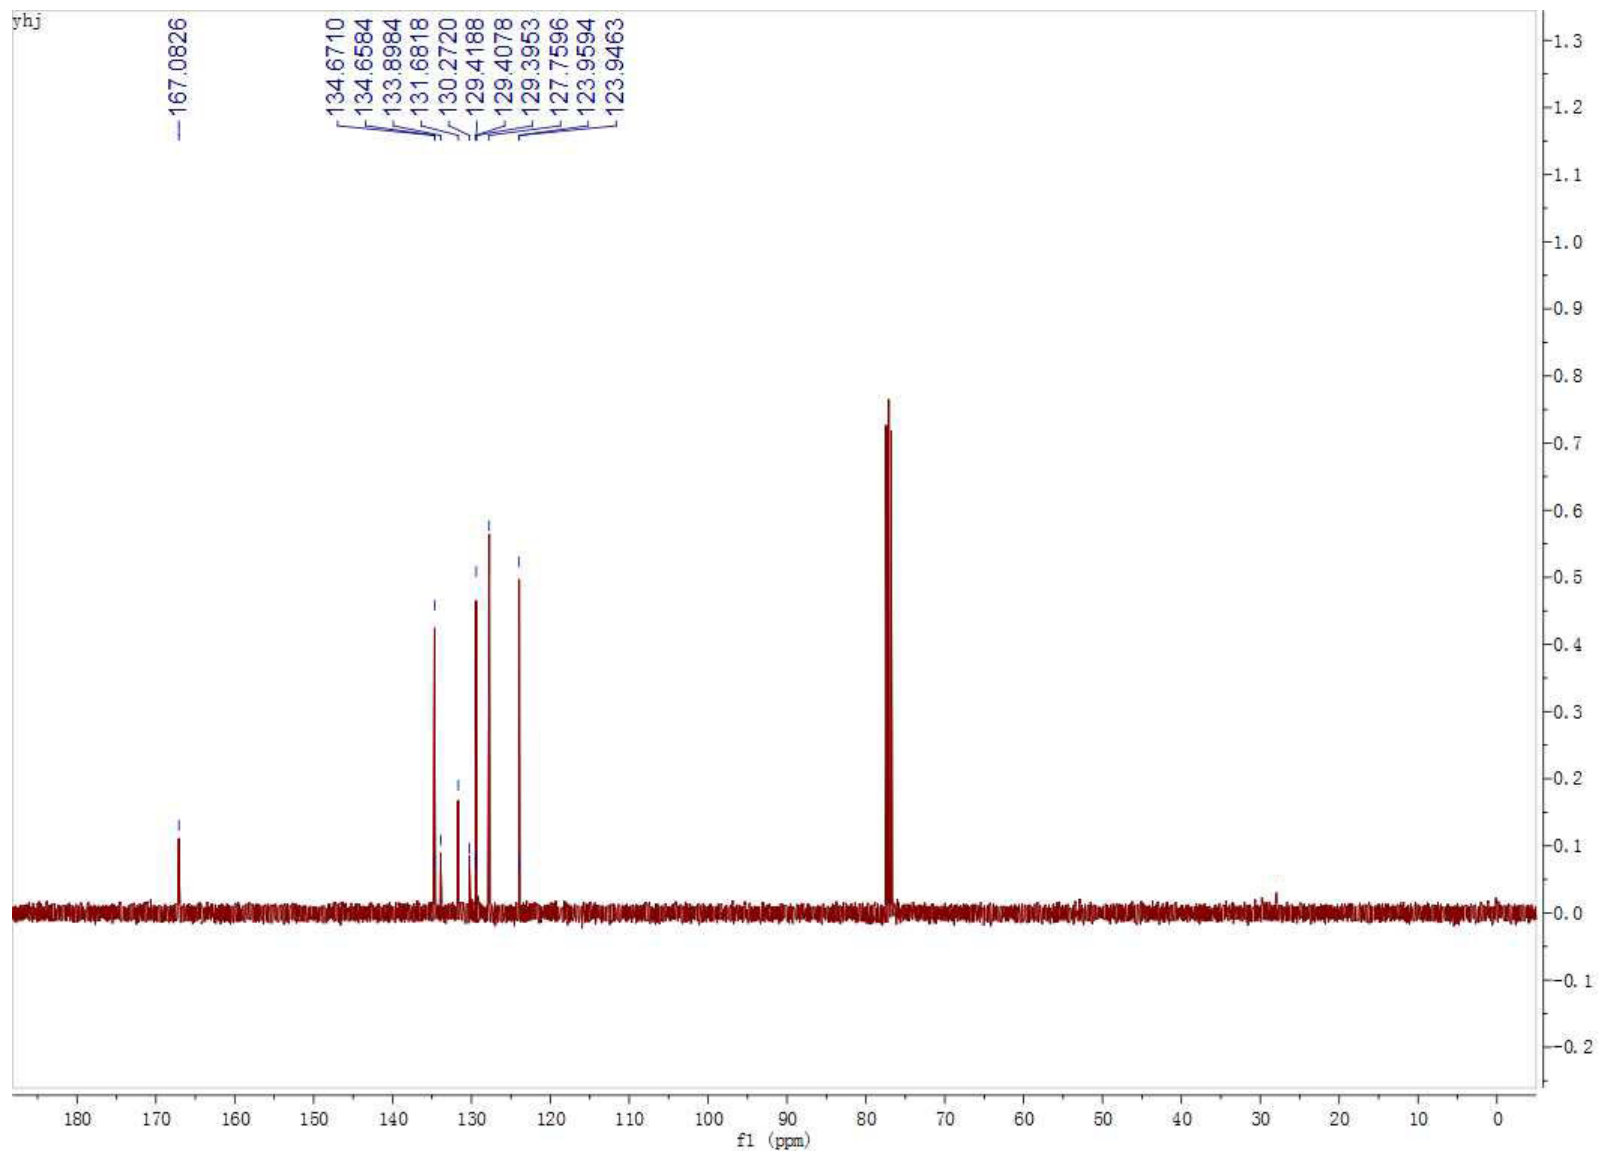

<sup>13</sup>C NMR for compound **2h**

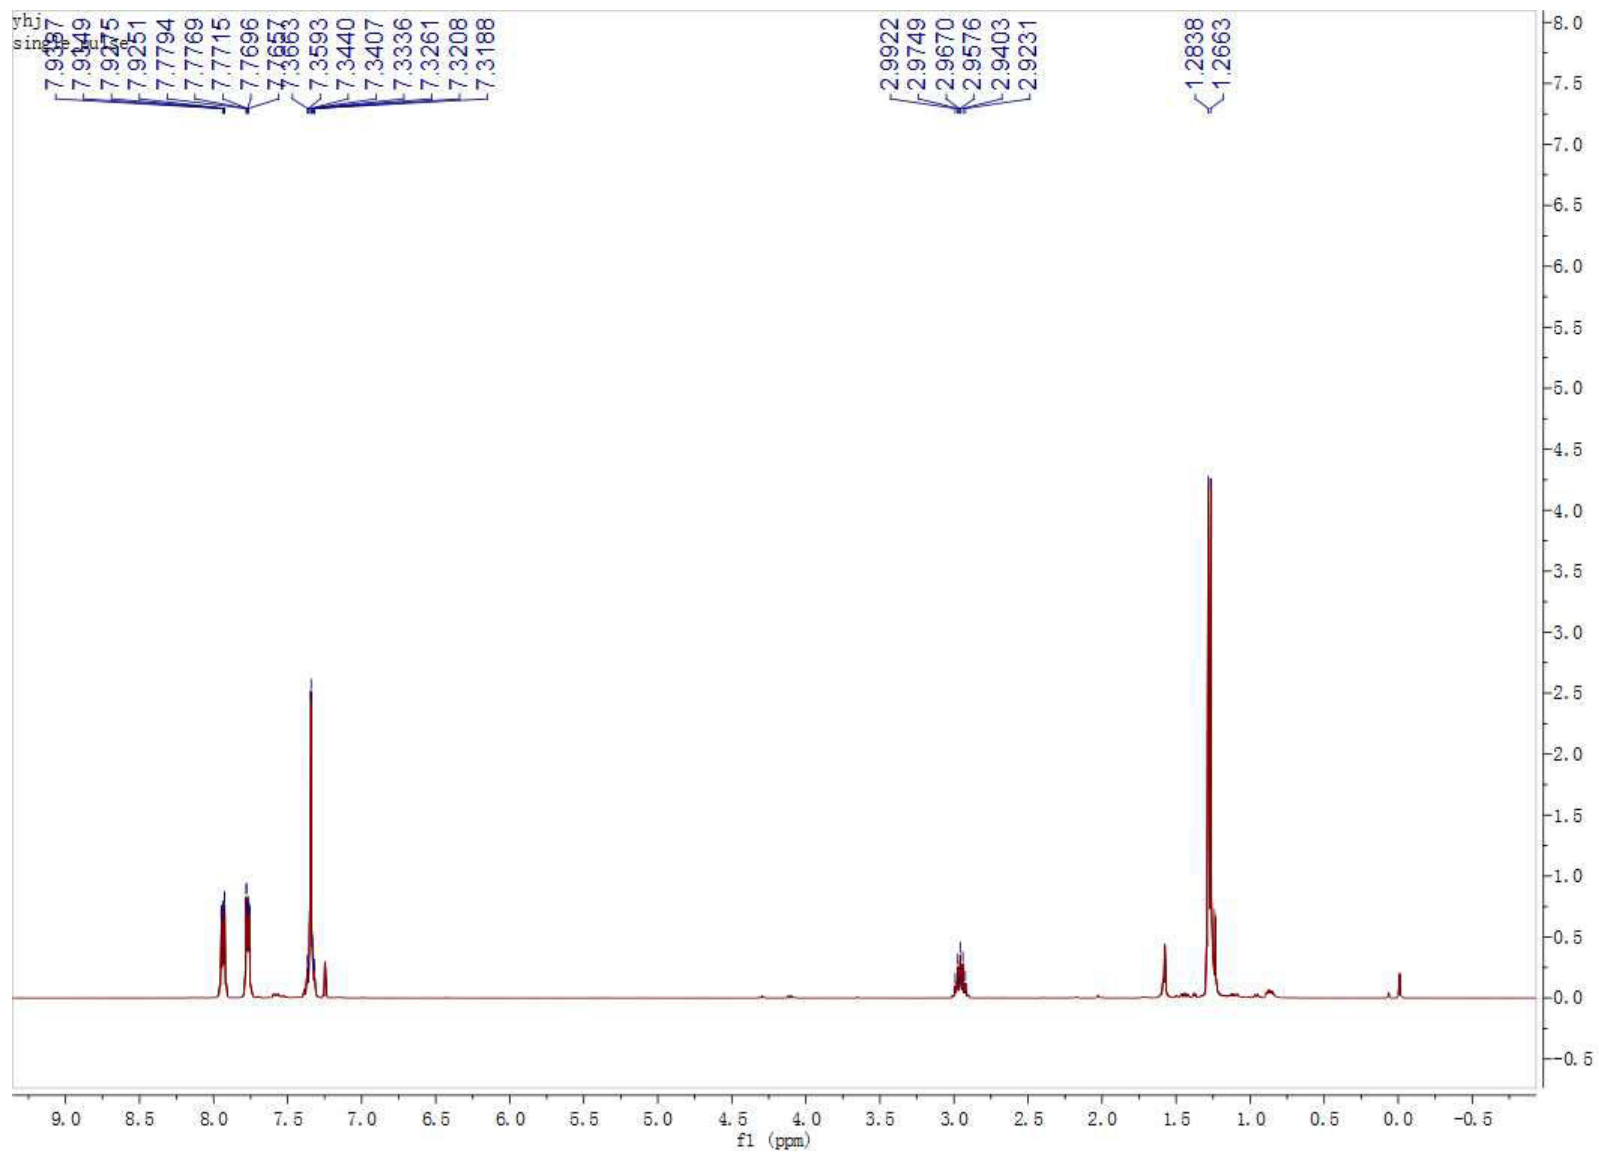

<sup>1</sup>H NMR for compound 2i

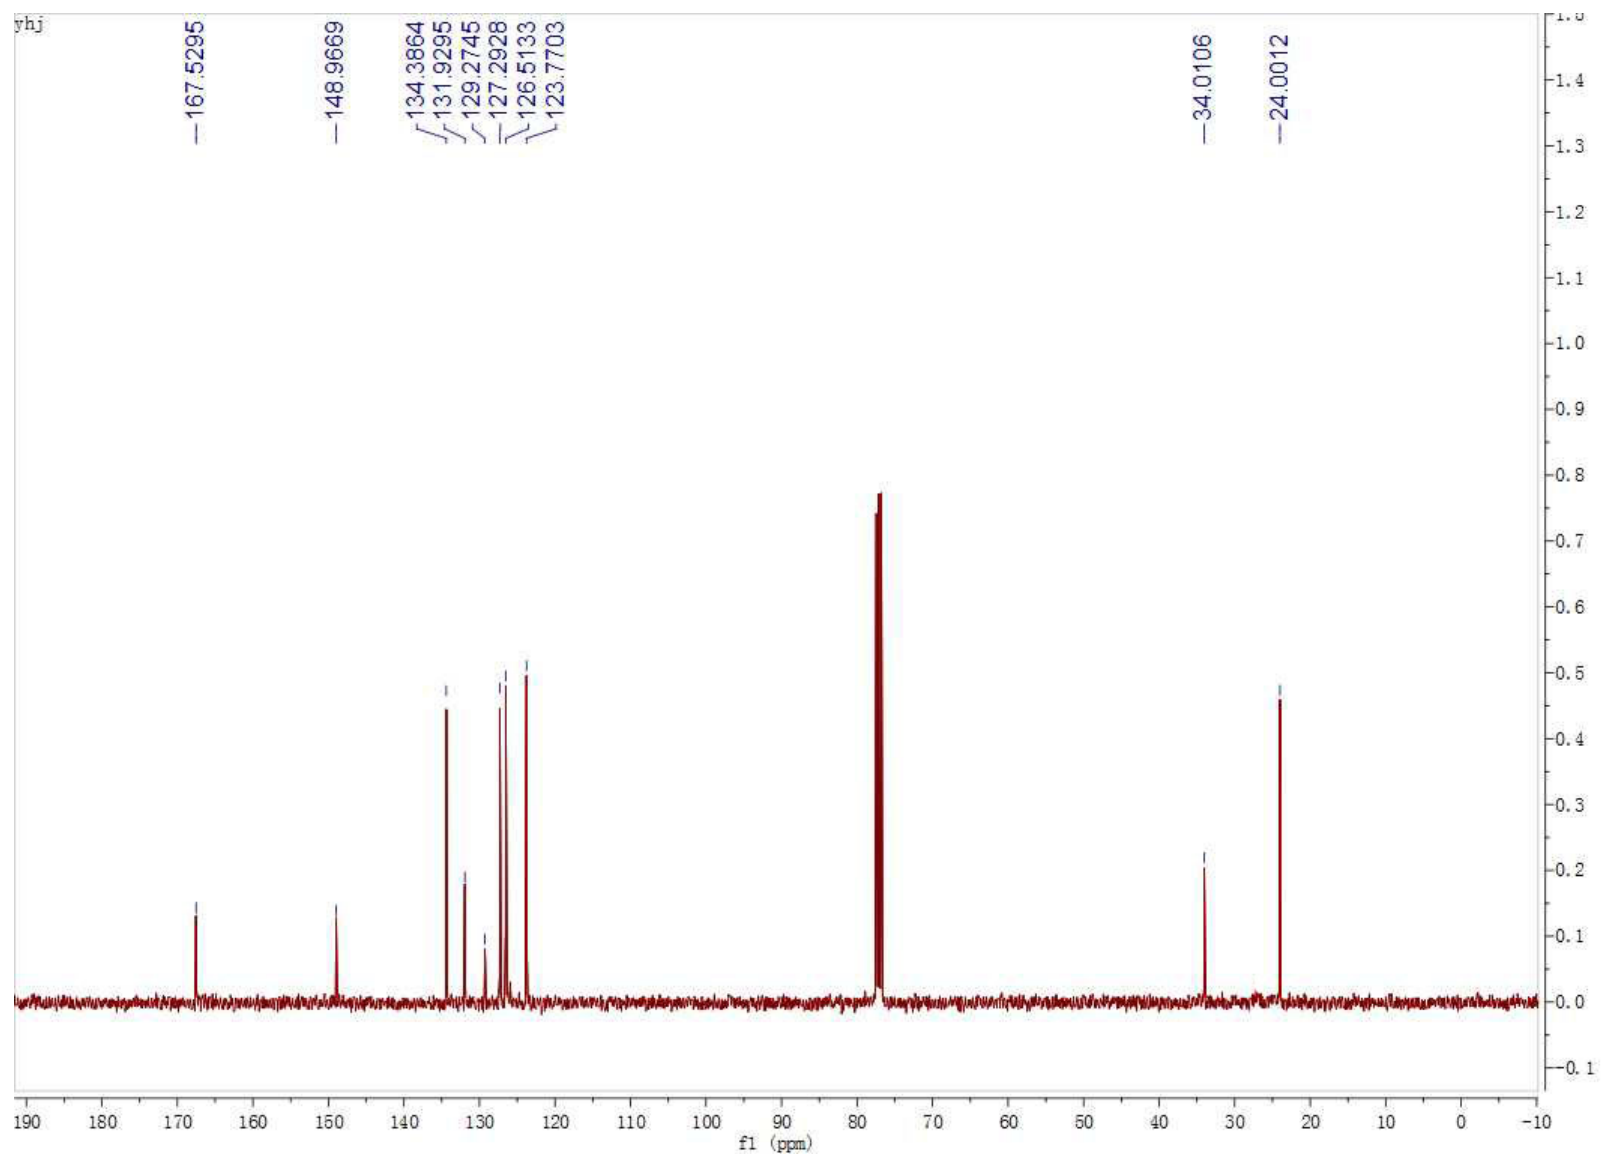

<sup>13</sup>C NMR for compound 2i

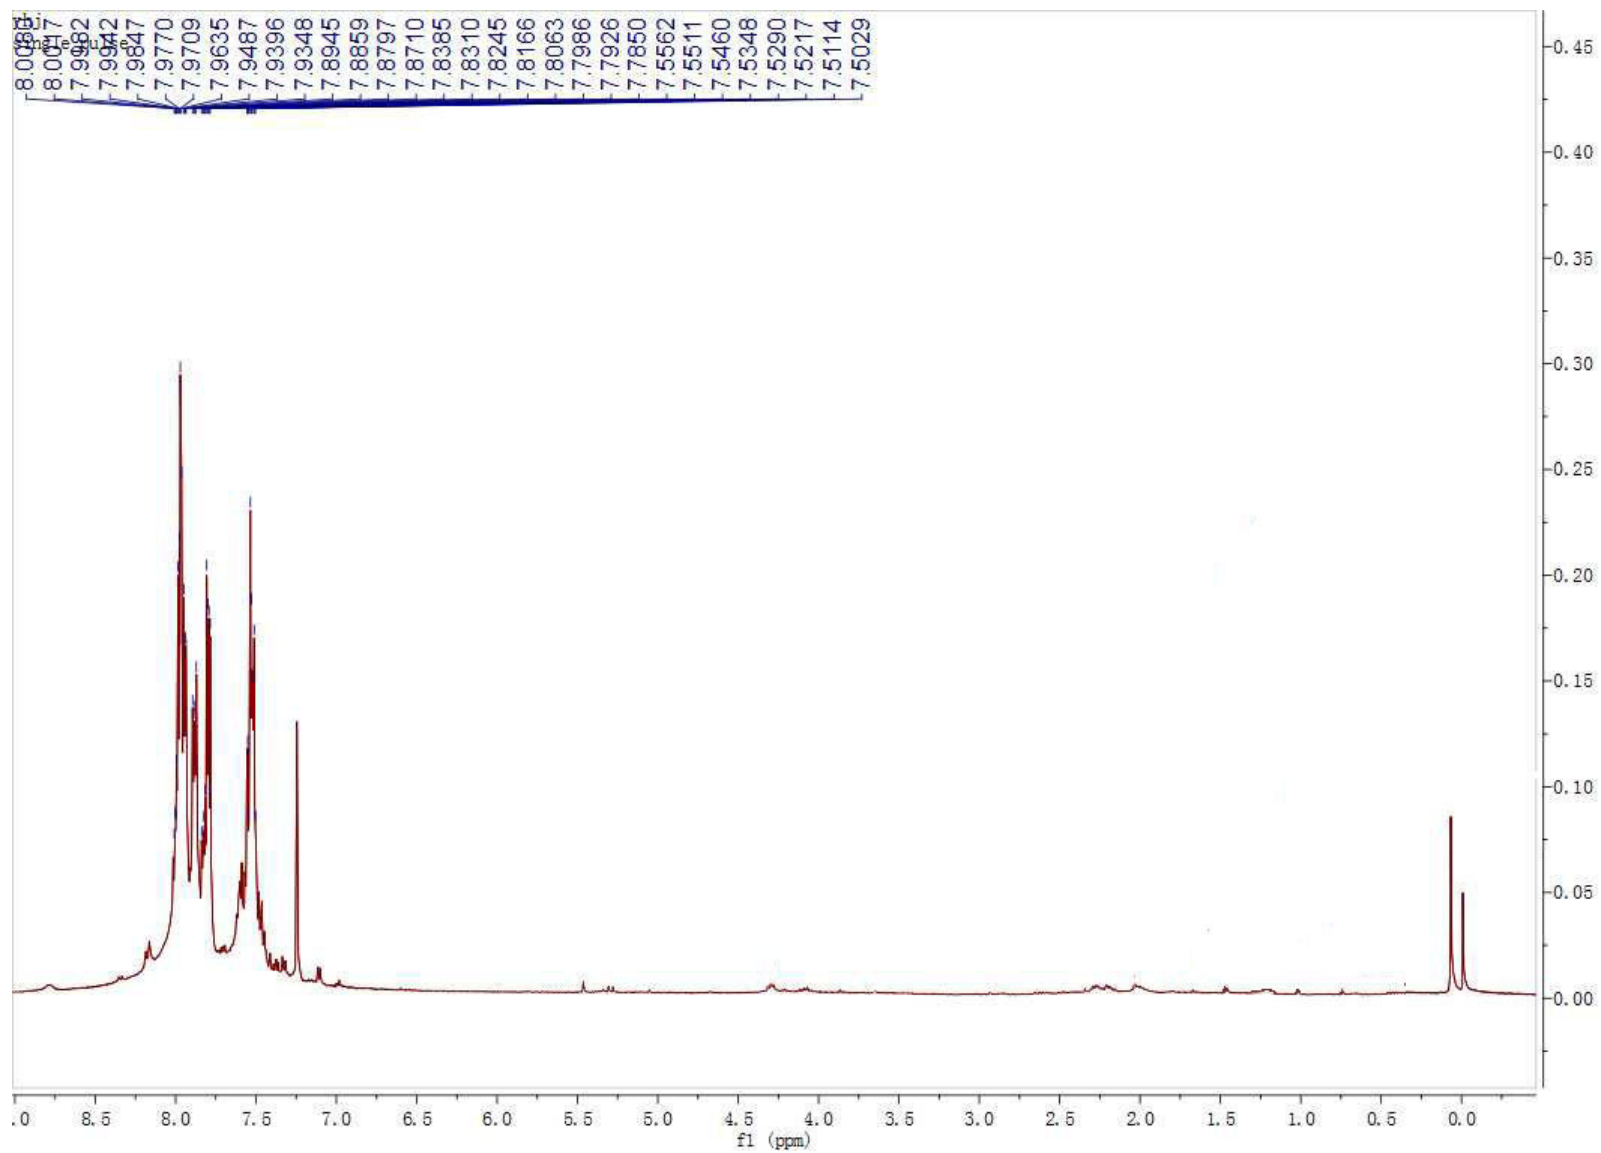

<sup>1</sup>H NMR for compound 2j

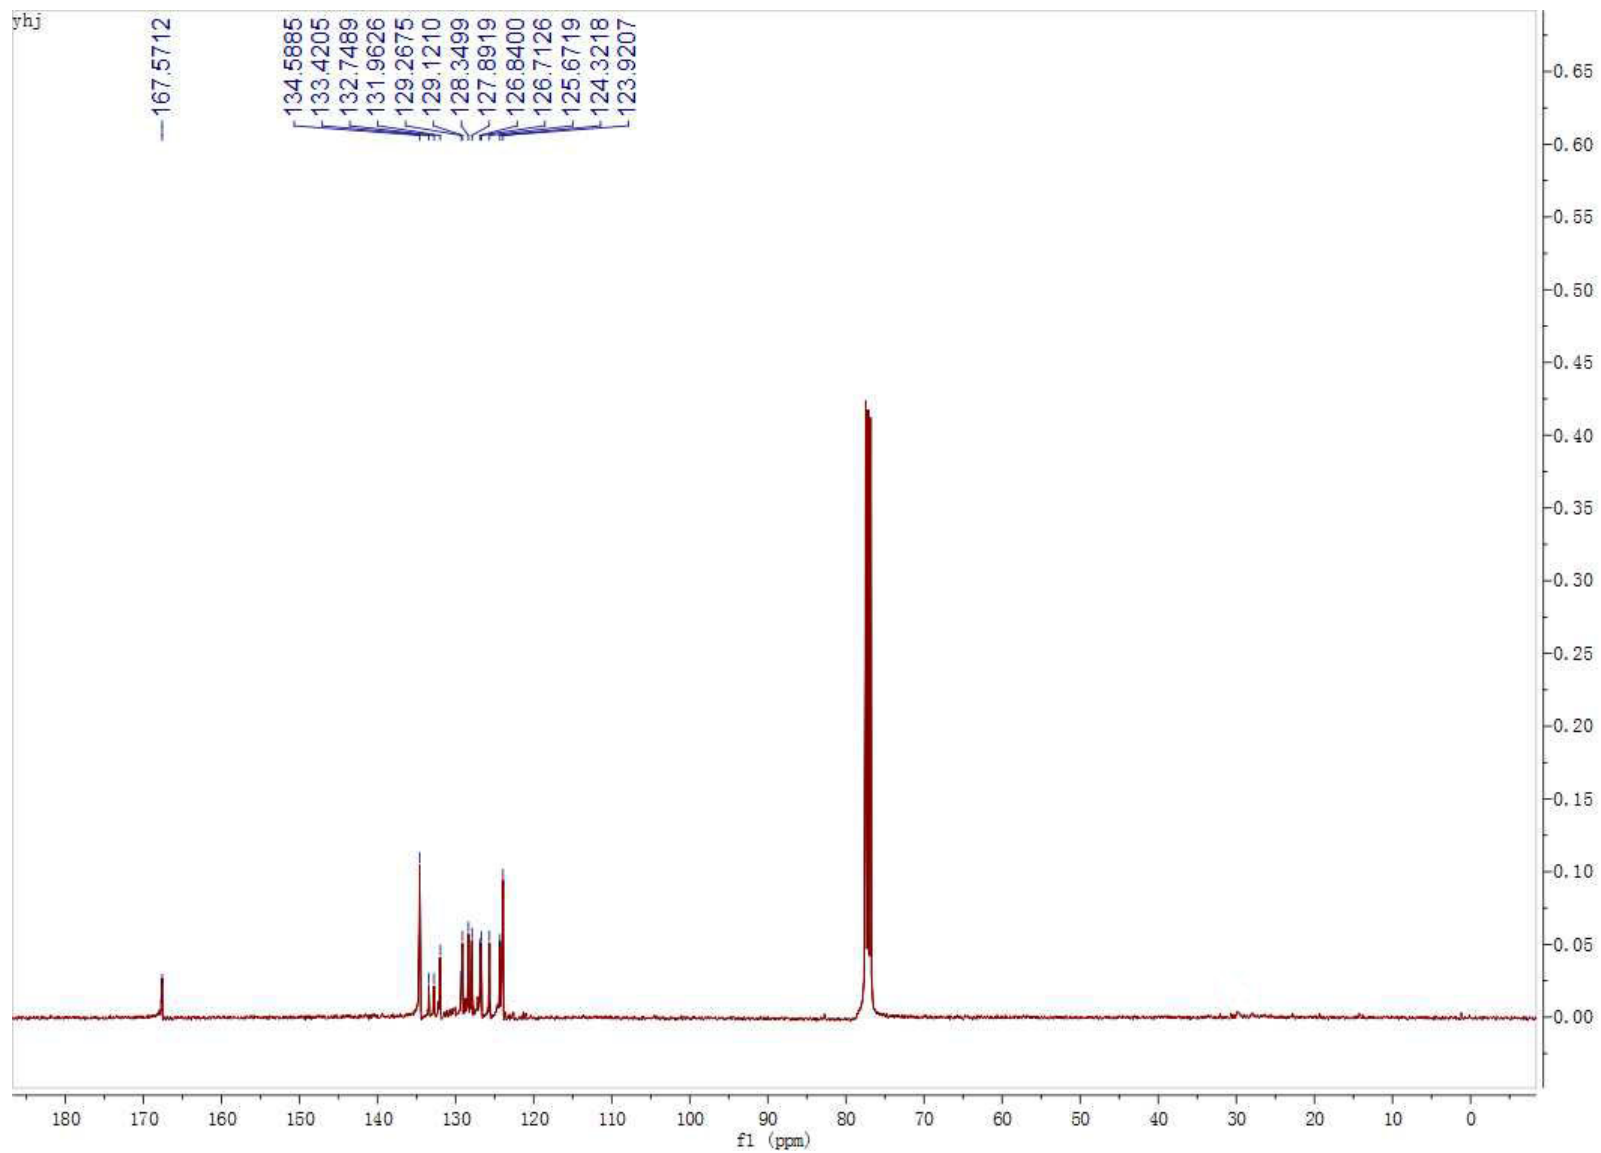

<sup>13</sup>C NMR for compound 2j

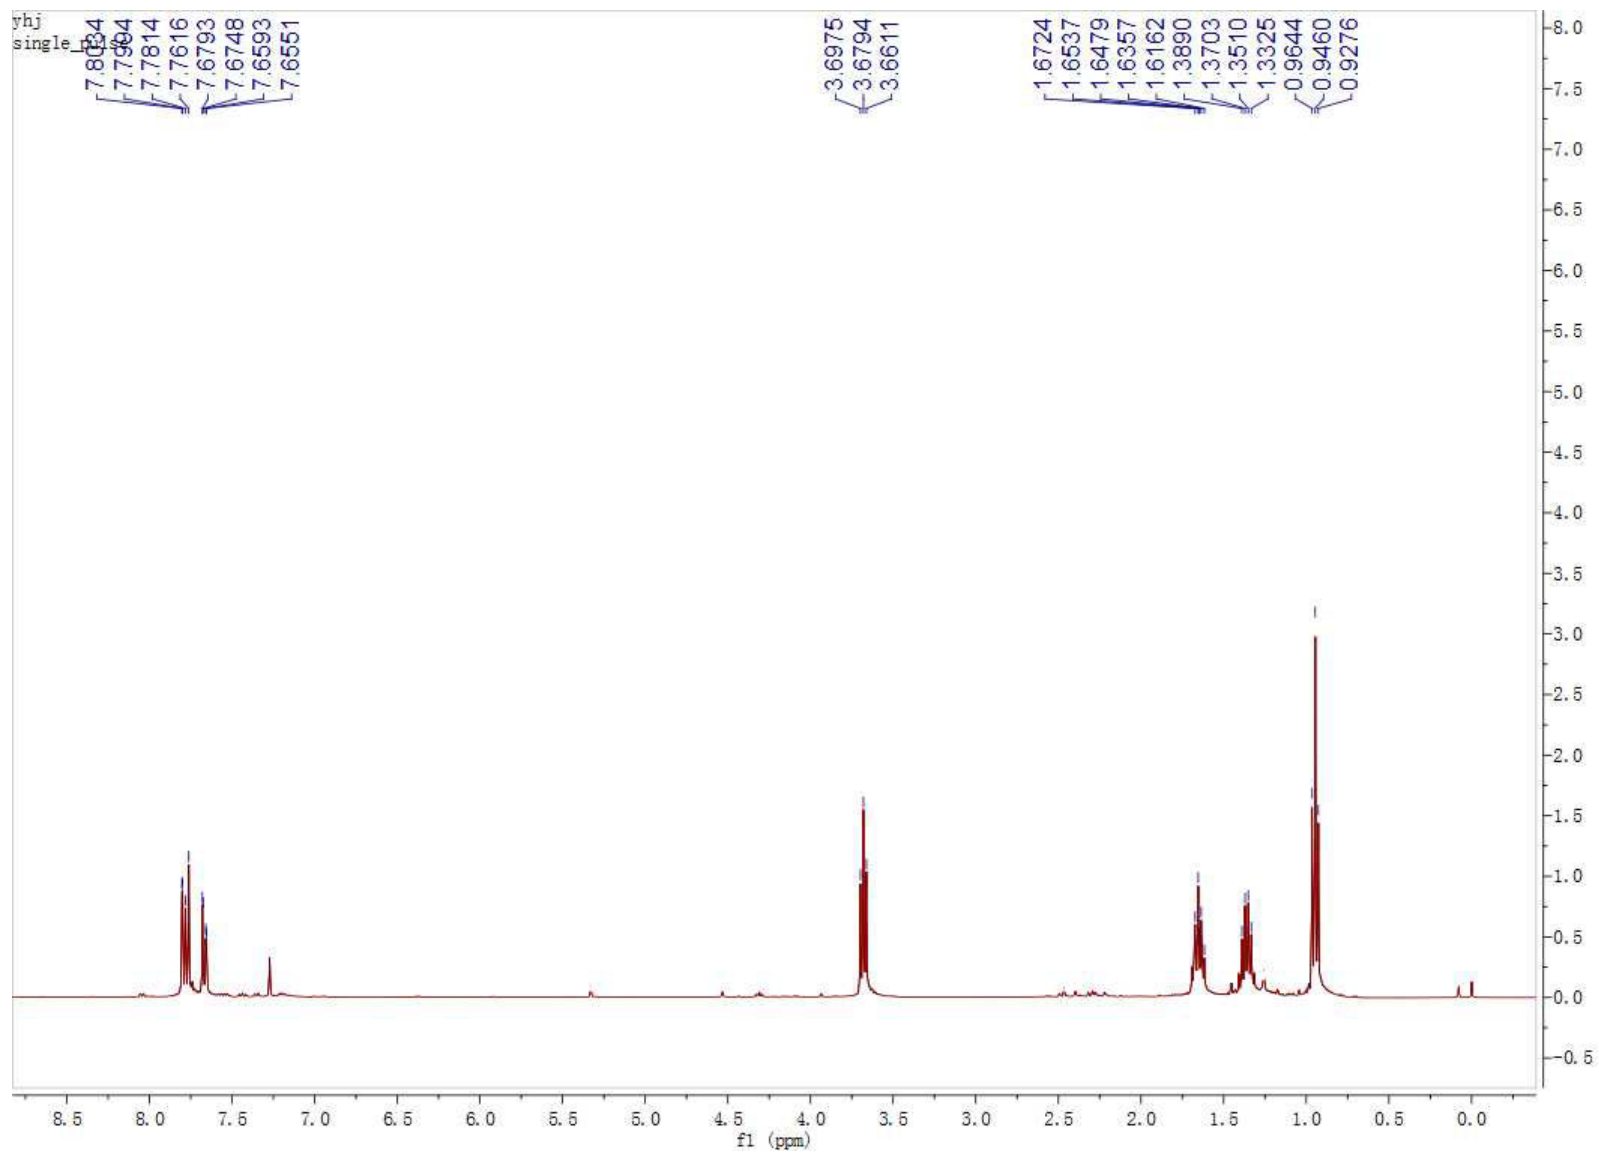

<sup>1</sup>H NMR for compound 2k

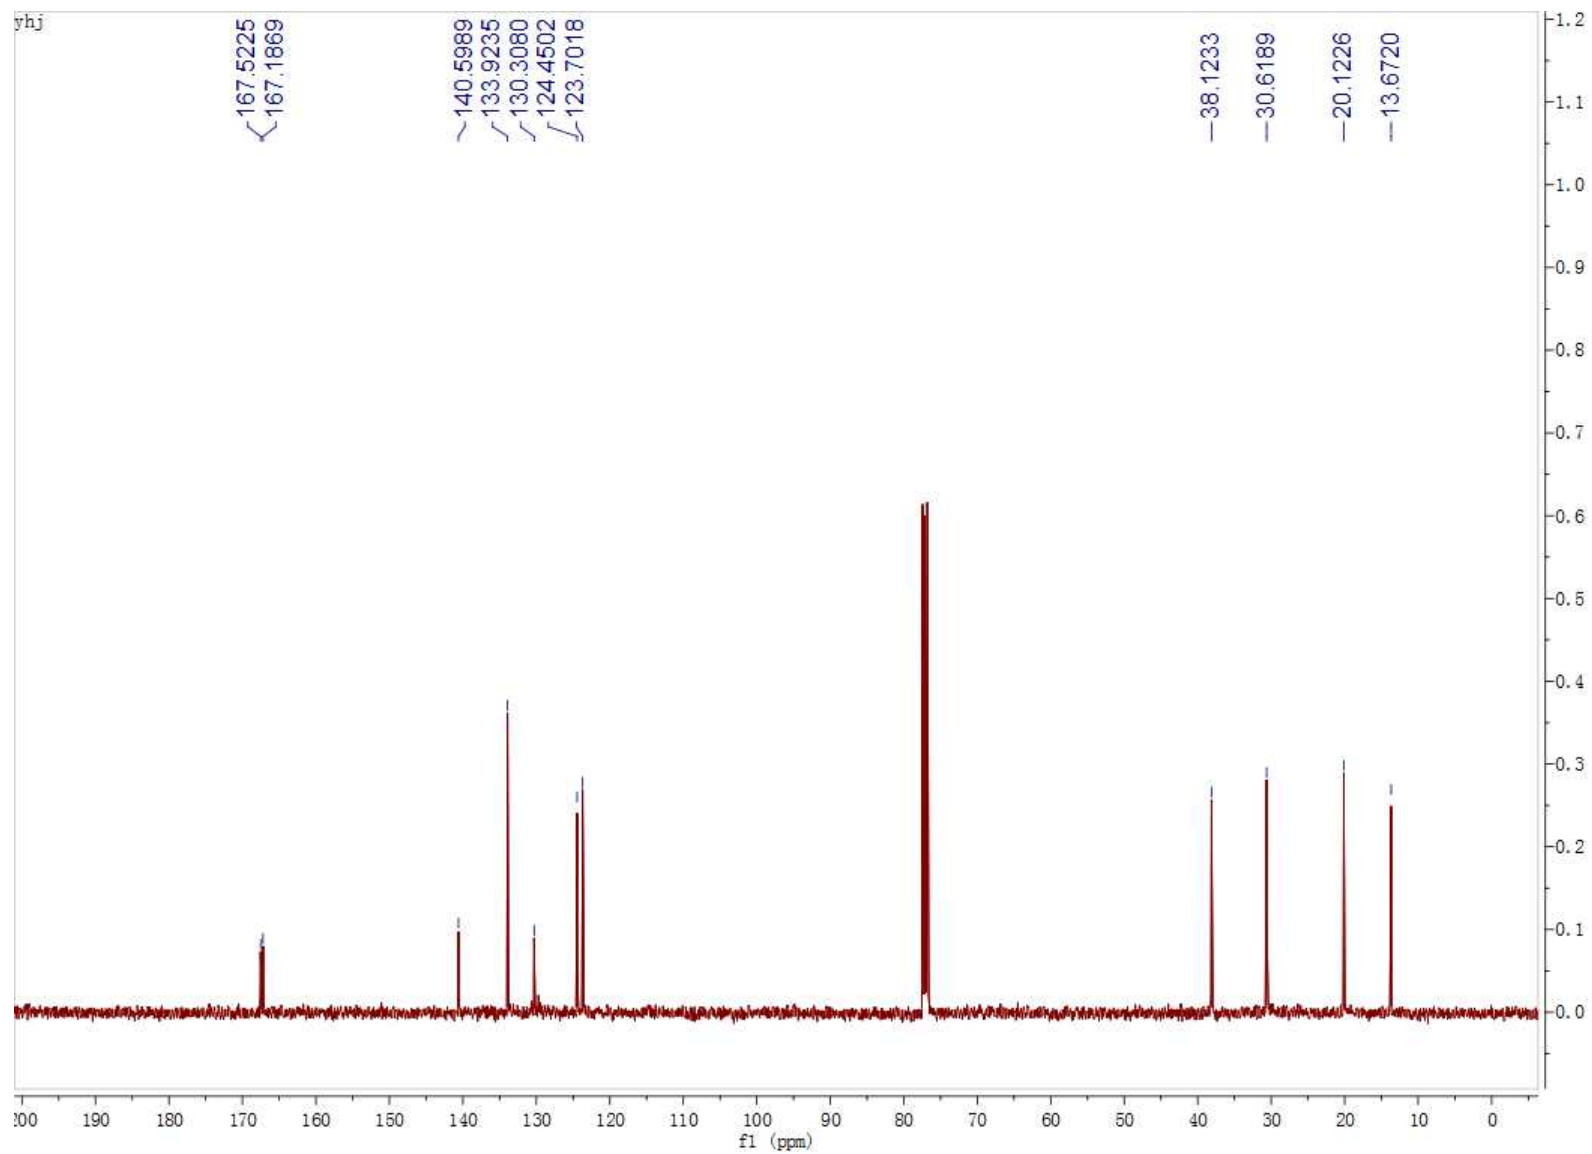

<sup>13</sup>C NMR for compound **2k**

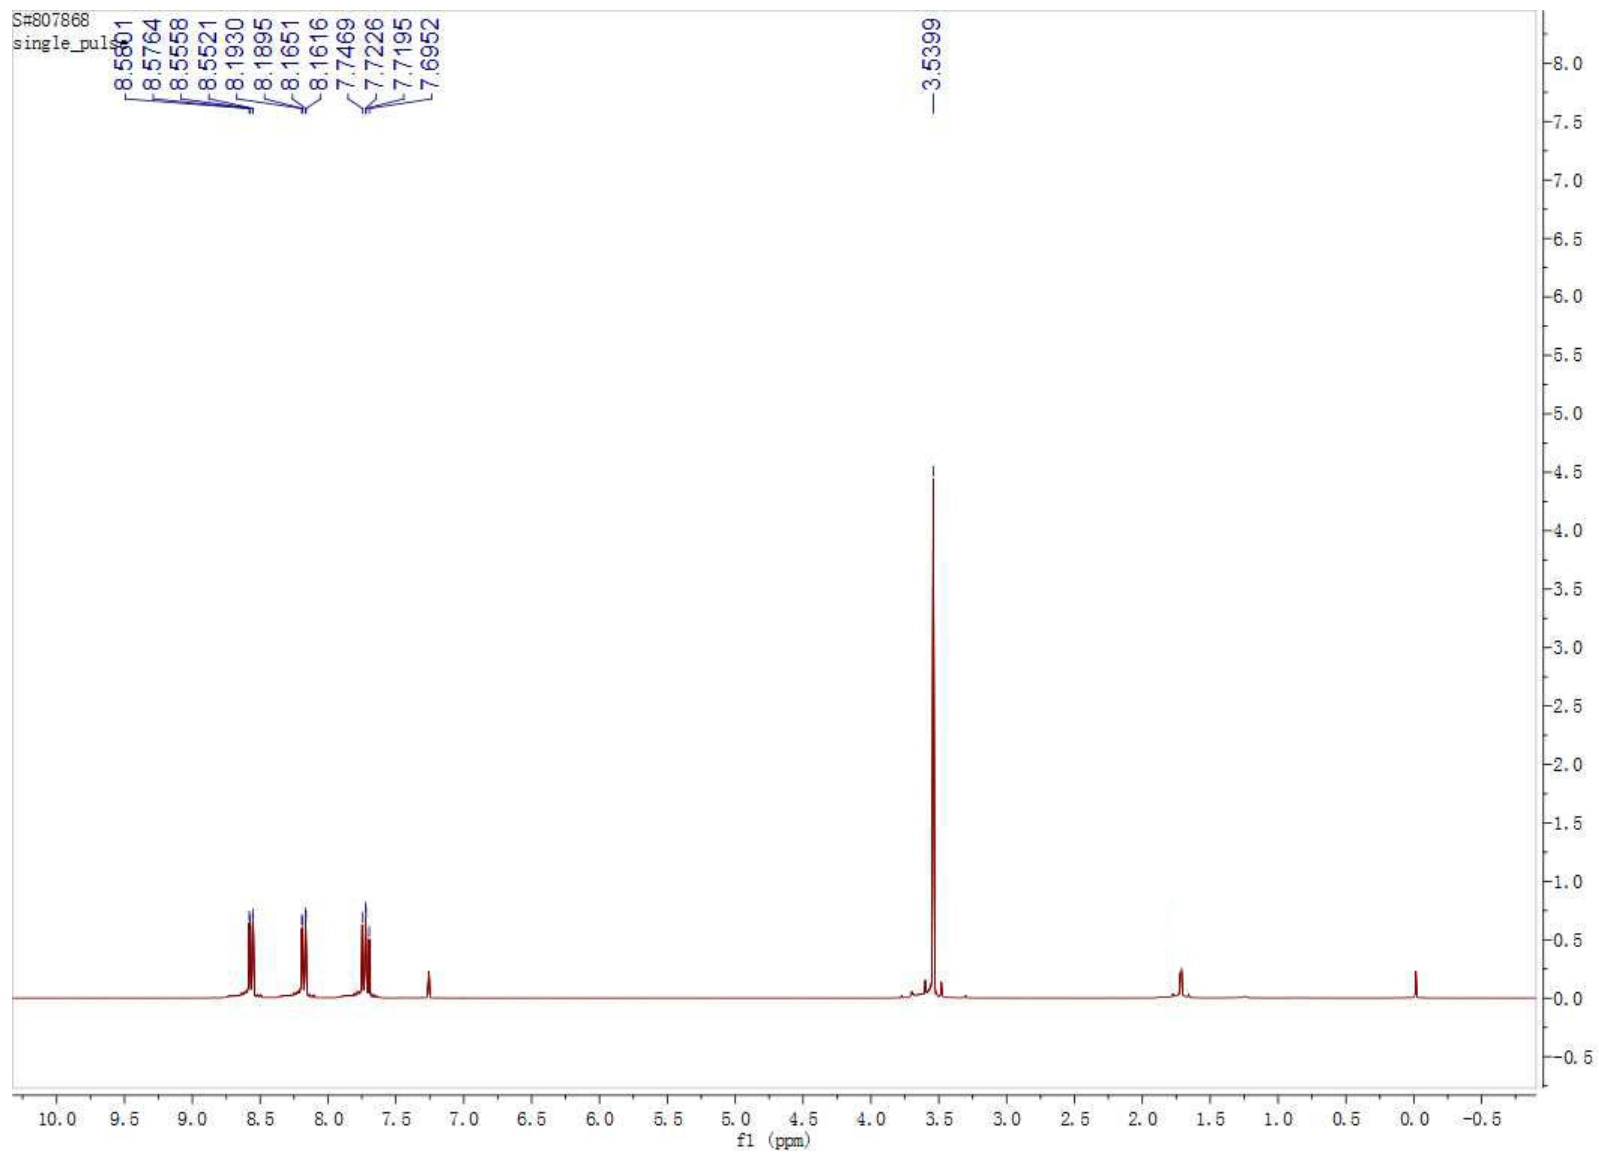

$^1\text{H}$  NMR for compound **21**



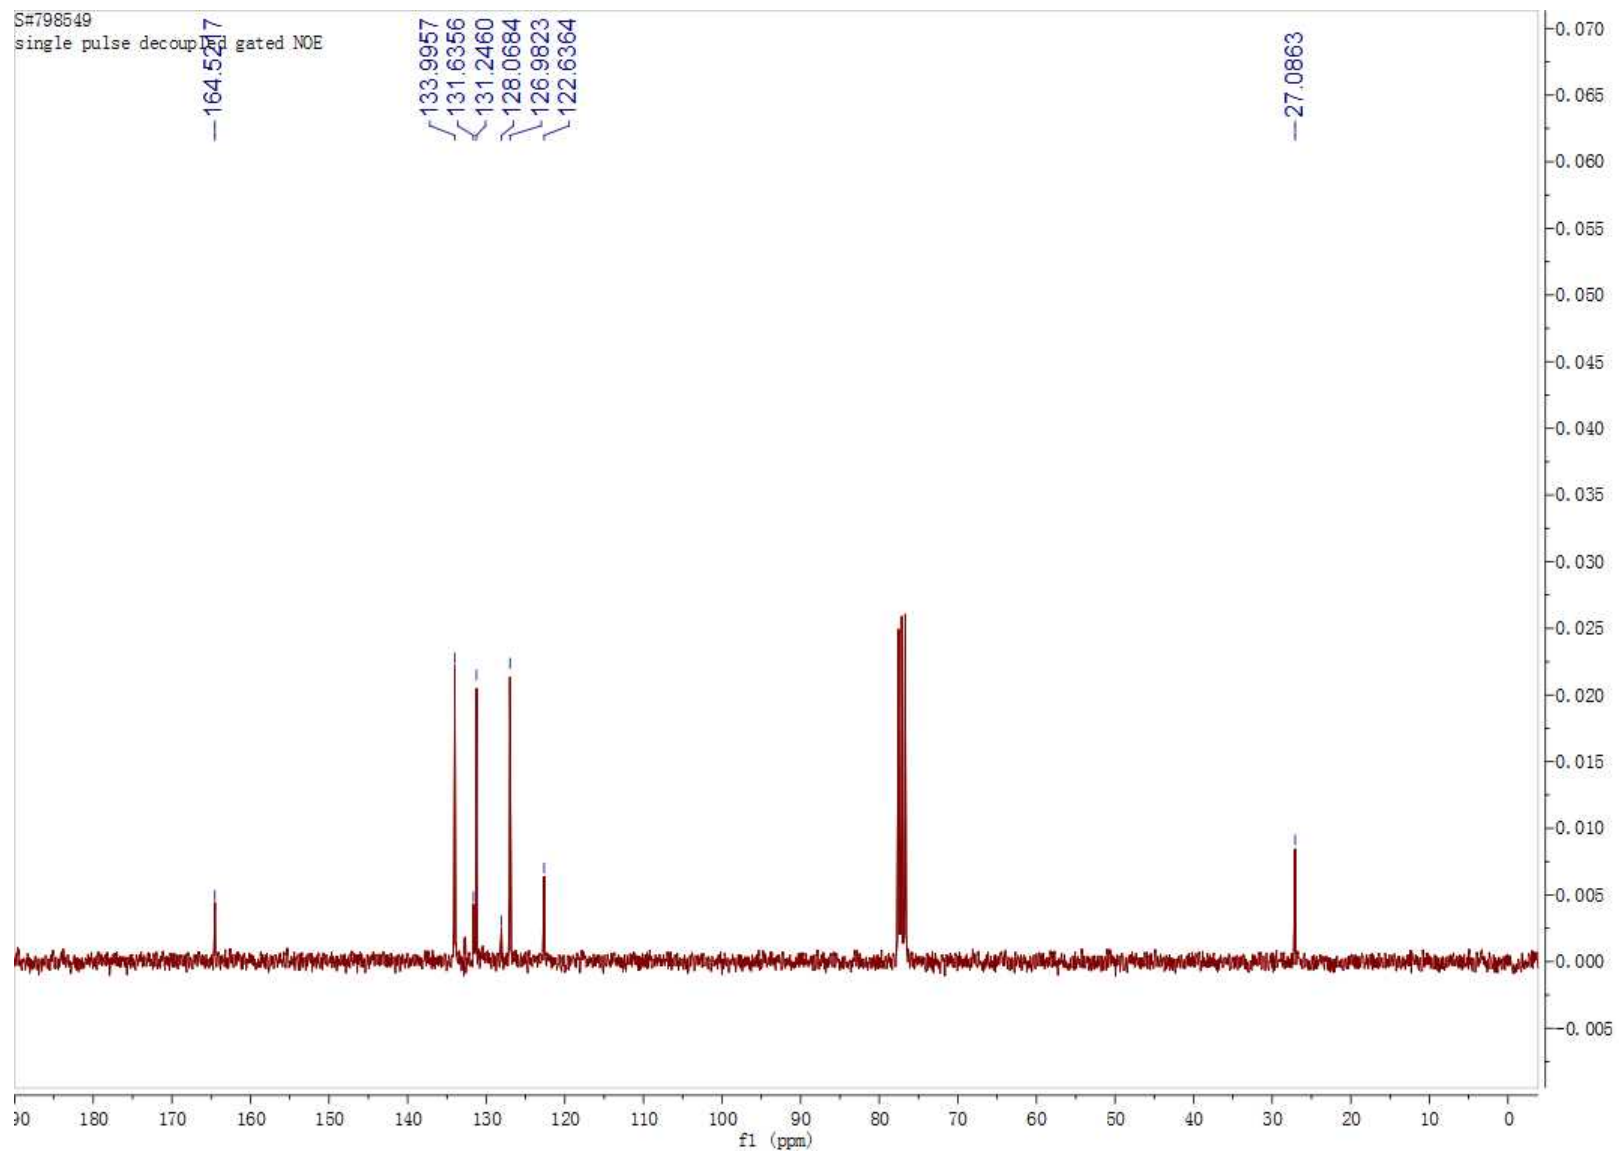

$^{13}\text{C}$  NMR for compound **2I**

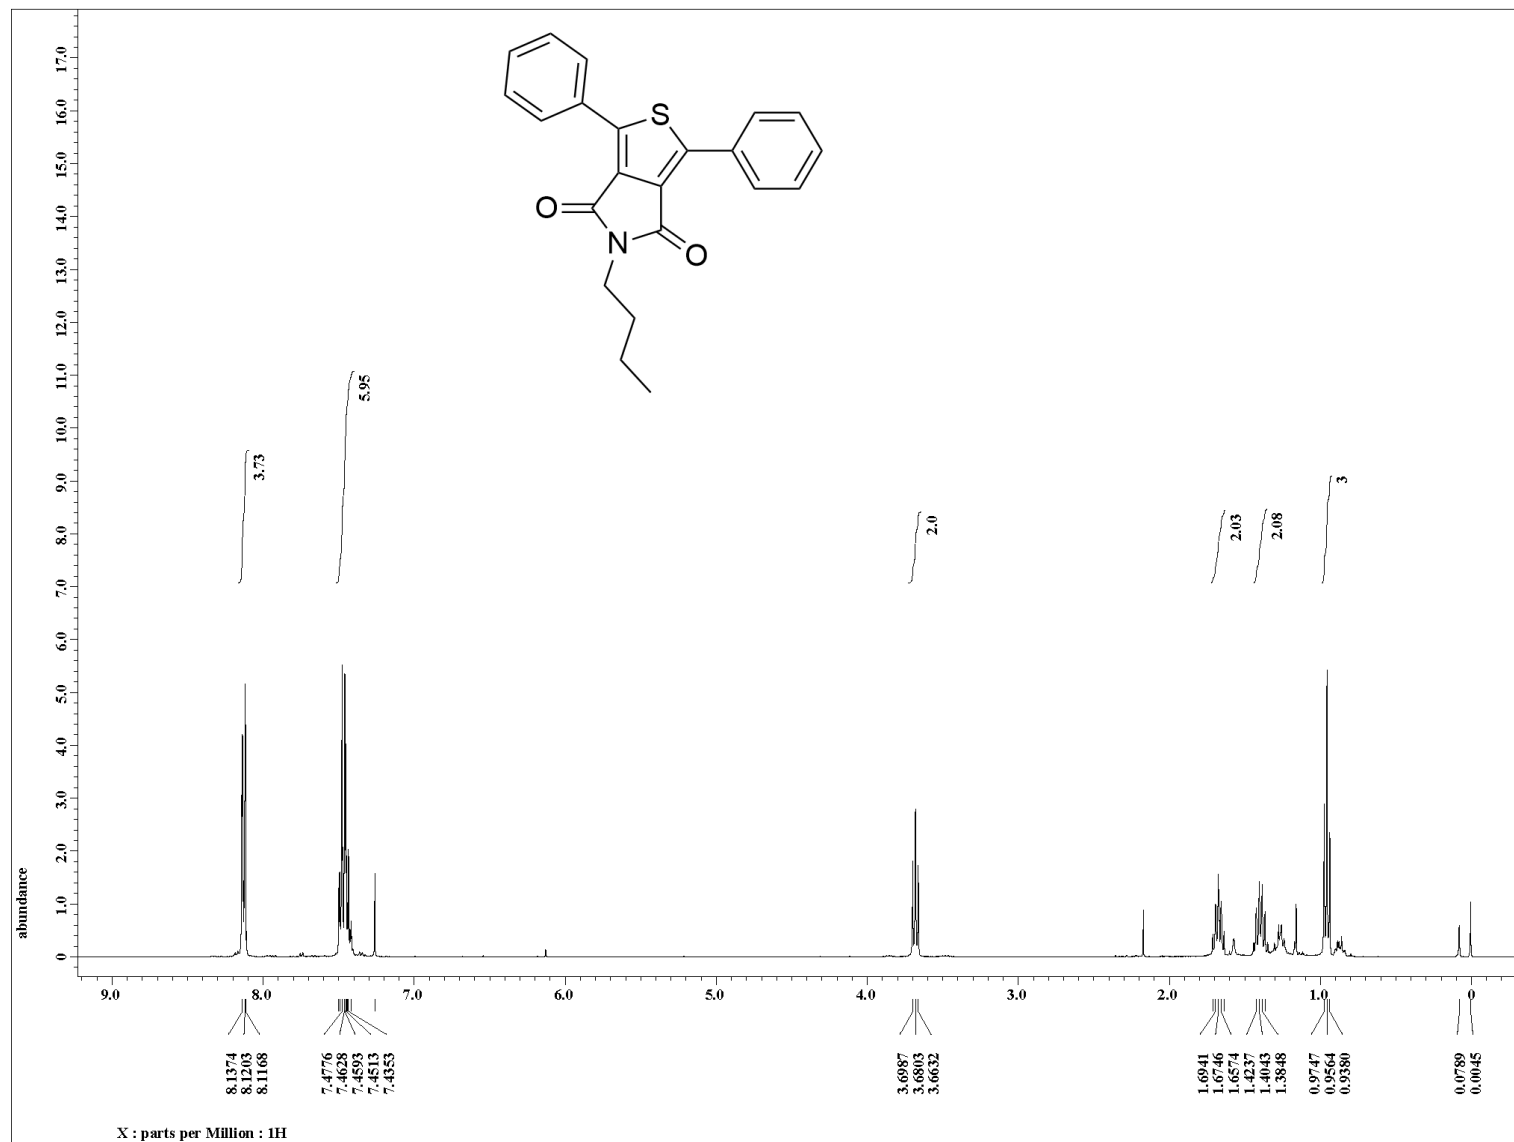

<sup>1</sup>H NMR for compound 4a

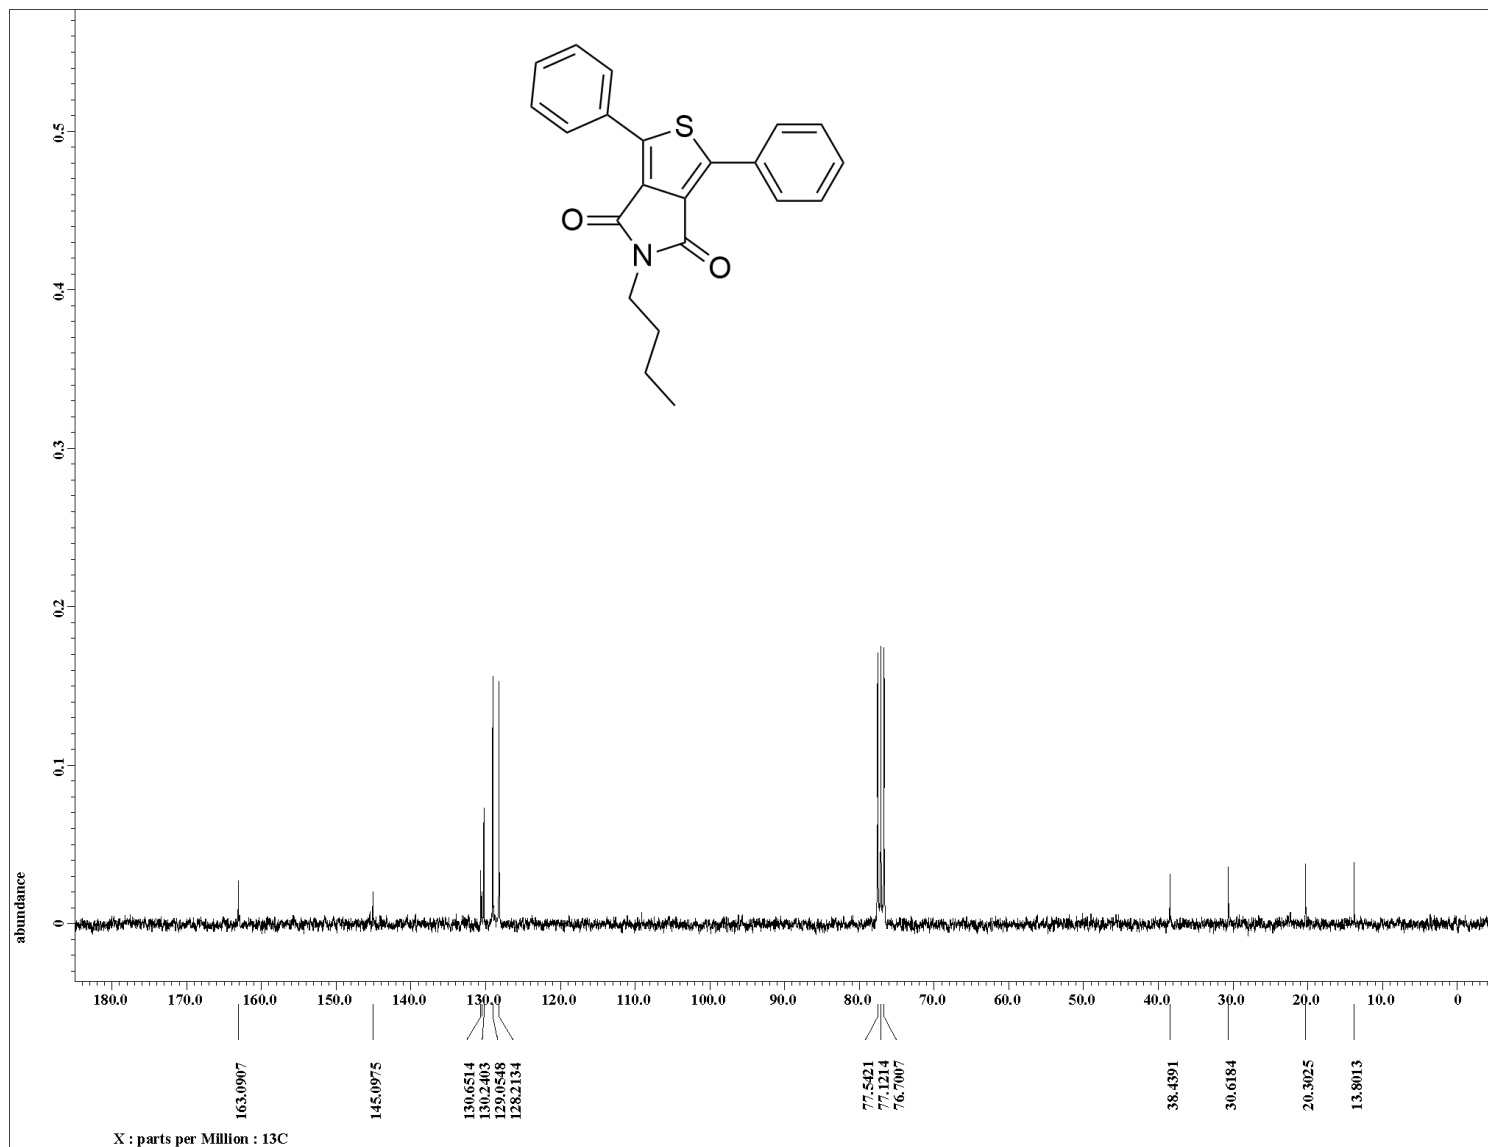

$^{13}\text{C}$  NMR for compound **4a**

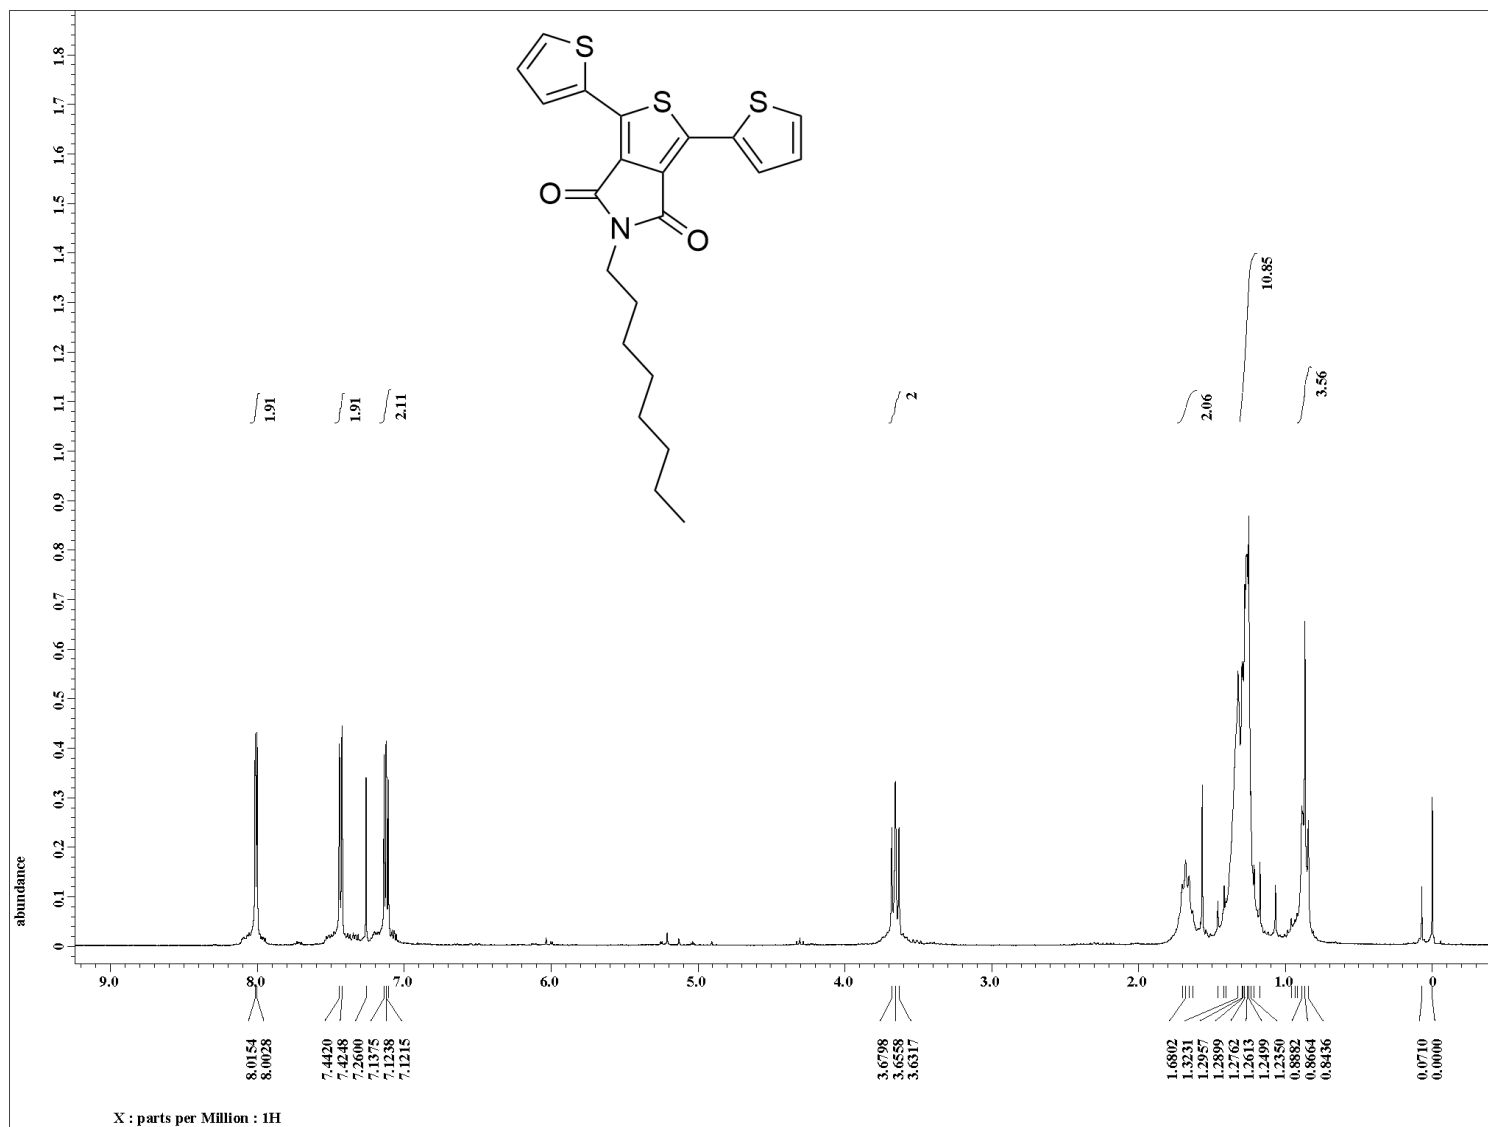

<sup>1</sup>H NMR for compound **4b**

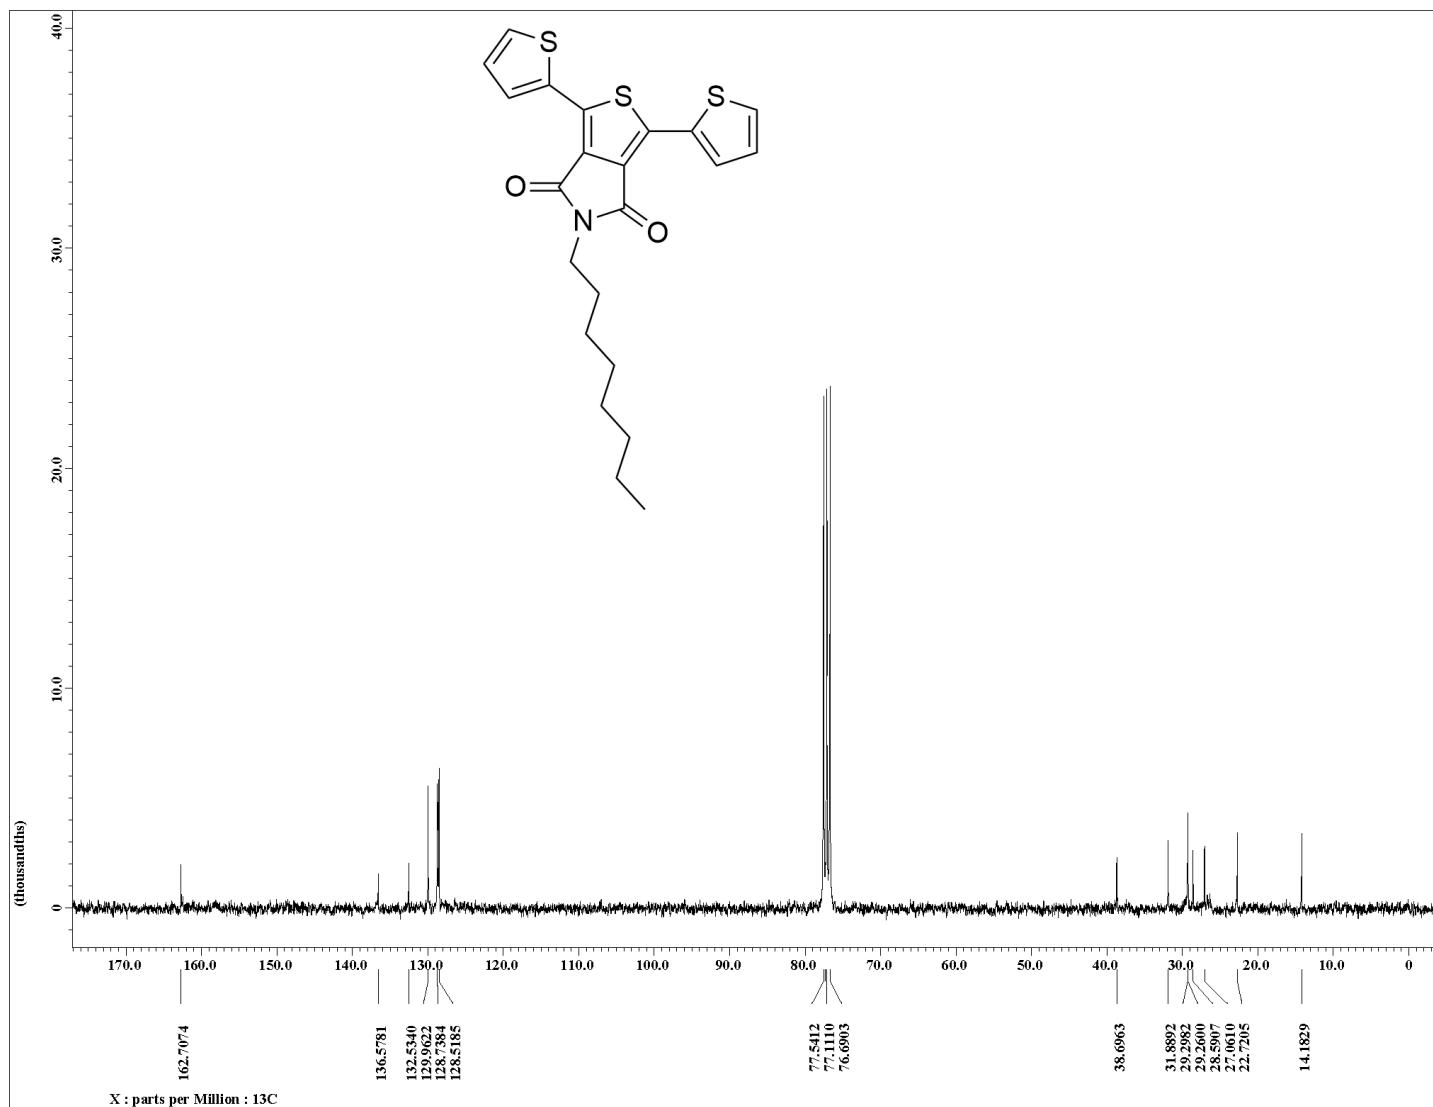

$^{13}\text{C}$  NMR for compound **4b**
